# Supplementary material for: Recensie: ‘Eine Kirche der Angst vor dem Fremden in mir’ van Christoph Schlingensief (Holland Festival)
Source: Royal Society of Chemistry journal article supplement (doi:10.1039/d3ra06469g), 2009-01-01
Supplement: d3ra06469g1.pdf [file d3ra06469g1.pdf]

## Synergistic Investigation of Azo-Thiazole Derivatives Incorporating Thiazole Moieties: Comprehensive Exploration of Synthesis, Characterization, Computational Insights, Solvatochromism, and Multimodal Biological Activity Assessment

### Abstract

In the present study, a novel series of azo-thiazole derivatives (**3a-c**) containing thiazole moiety unit was successfully synthesized. The structure of these derivatives was examined by spectroscopic techniques such as  $^1\text{H}$  NMR,  $^{13}\text{C}$  NMR, FT-IR, and HRMS. Further, the novel synthesized compounds were evaluated for their in-vitro biological activities such as antibacterial and anti-inflammatory as well as for *in silico* study. The antibacterial results demonstrated that compounds **3a** and **3c** (MIC=10  $\mu\text{g/mL}$ ) have notable potency against *Staphylococcus aureus* compared with azithromycin (MIC=40  $\mu\text{g/mL}$ ); Compound **3b** displayed a fourfold higher potency (24 recovery days, 1.83 mg/day) than HAMAZINE (28 recovery days, 4.14 mg/day) in promoting burn wound healing, and it also exhibited comparable inhibitory activity against screened bacterial pathogens when compared to reference drug. Docking on 1KZN, considering the excellent impact of the compounds on the Crystal Structure of E. coli 24kDa Domain in Complex with Clorobiocin, indicated a close binding of compounds 3a-c with the active site of protein 1KZN, in line with their observed biological activity. Additionally, we conducted molecular dynamics simulations on the docked complexes of compounds 3a-c with PDB: 1KZN to assess their stability and molecular interactions. Furthermore, we assessed the compounds' electrochemical characteristics via DFT calculations. Leveraging PASS and pkCSM platforms, we gained insights into controlling bioactivity and physicochemical features, highlighting these compounds as promising candidates for new active agents

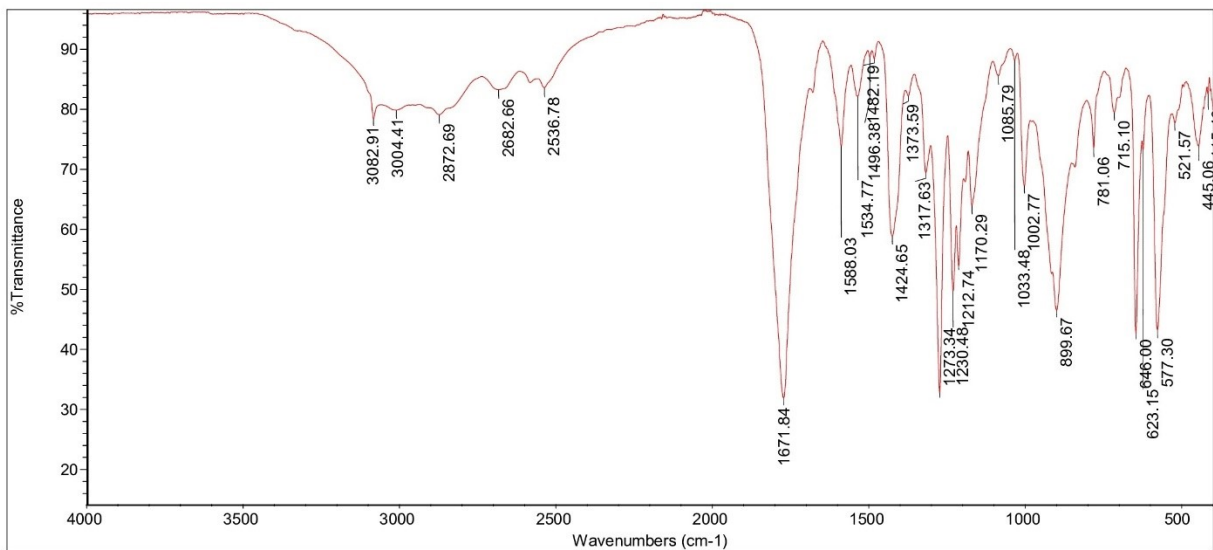

Fig .S1. Ftir spectrum of compound 3

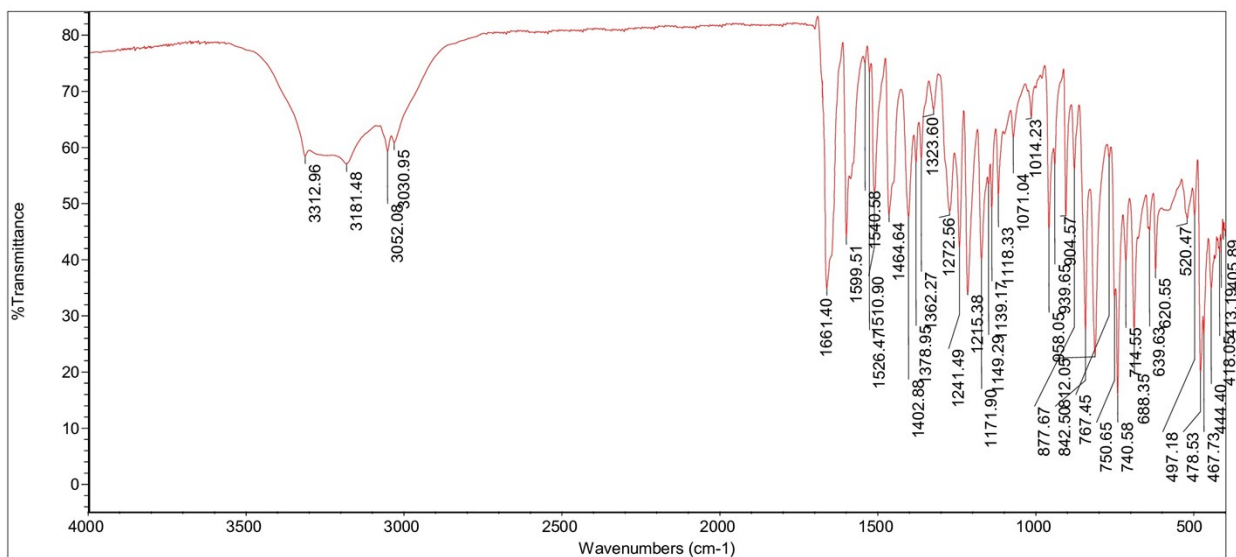

Fig .S2. Ftir spectrum of compound 3a

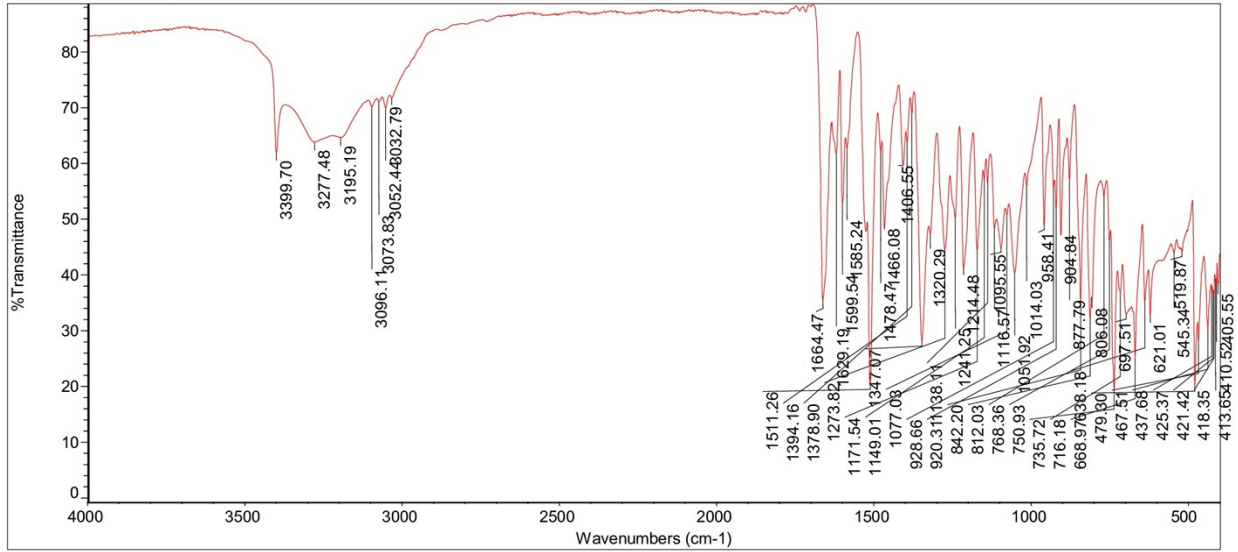

Fig .S3. Ftir spectrum of compound 3b

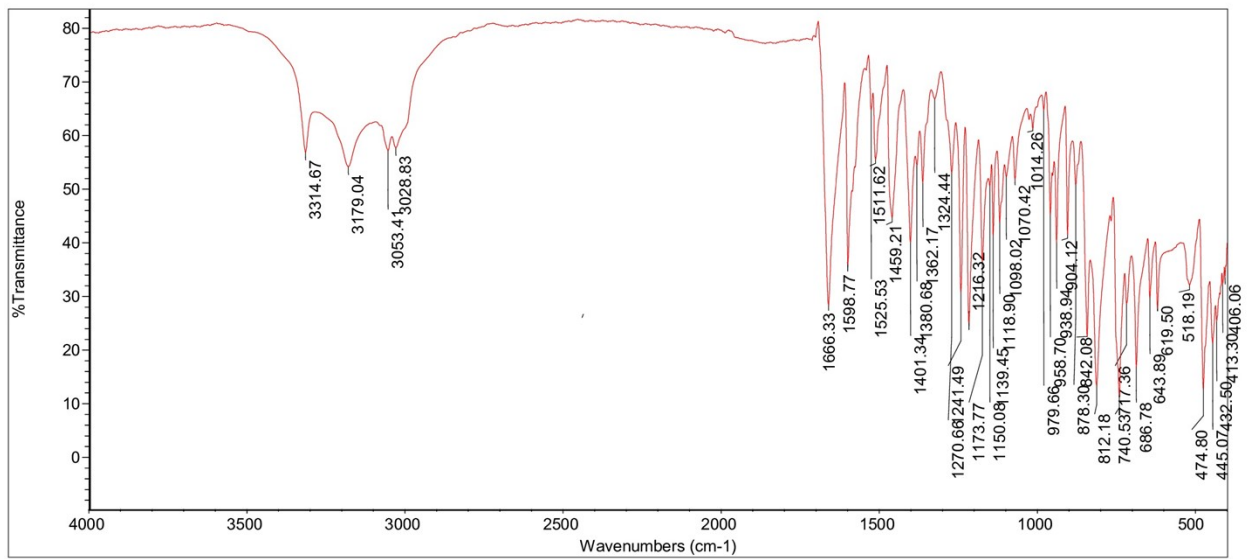

Fig .S4. Ftir spectrum of compound 3c

Sample Code: S-12- in DMSO (Mr.Sangar Hassaan)

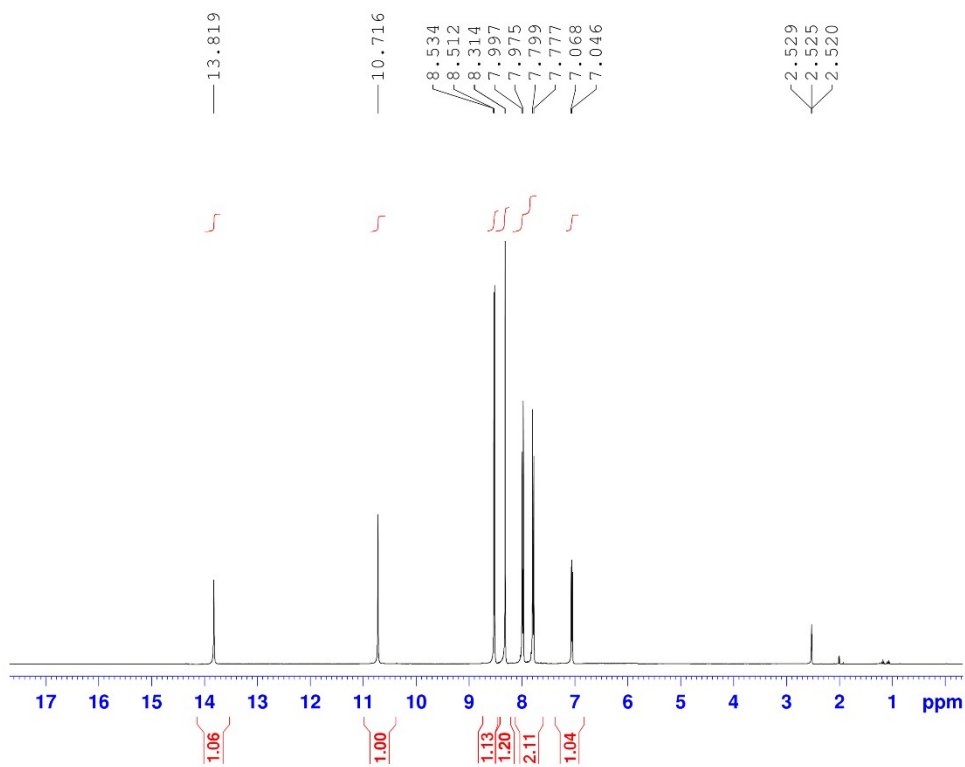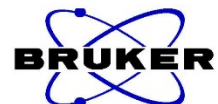

NAME Salahaddin-Kurdistan UN  
EXPNO 81  
PROCNO 1  
Date\_ 20230225  
Time 8.14  
INSTRUM spect  
PROBHD 5 mm PABBO BB-  
FULPROG zg30  
TD 65536  
SOLVENT DMSO  
NS 20  
DS 0  
SWH 8012.820 Hz  
FIDRES 0.122266 Hz  
AQ 4.0894966 sec  
RG 101  
DW 62.400 usec  
DE 6.50 usec  
TE 293.1 K  
D1 4.0000000 sec  
TD0 1

----- CHANNEL f1 -----  
NUC1 1H  
P1 14.00 usec  
PL1 -2.00 dB  
PLW 11.86359406 W  
SFO1 400.2236020 MHz  
SI 32768  
SF 400.2200000 MHz  
WDW EM  
SSB 0  
LB 0.30 Hz  
GB 0  
FC 1.00

Fig.S5.hnmr spectrum of 3

Sample Code: S-2

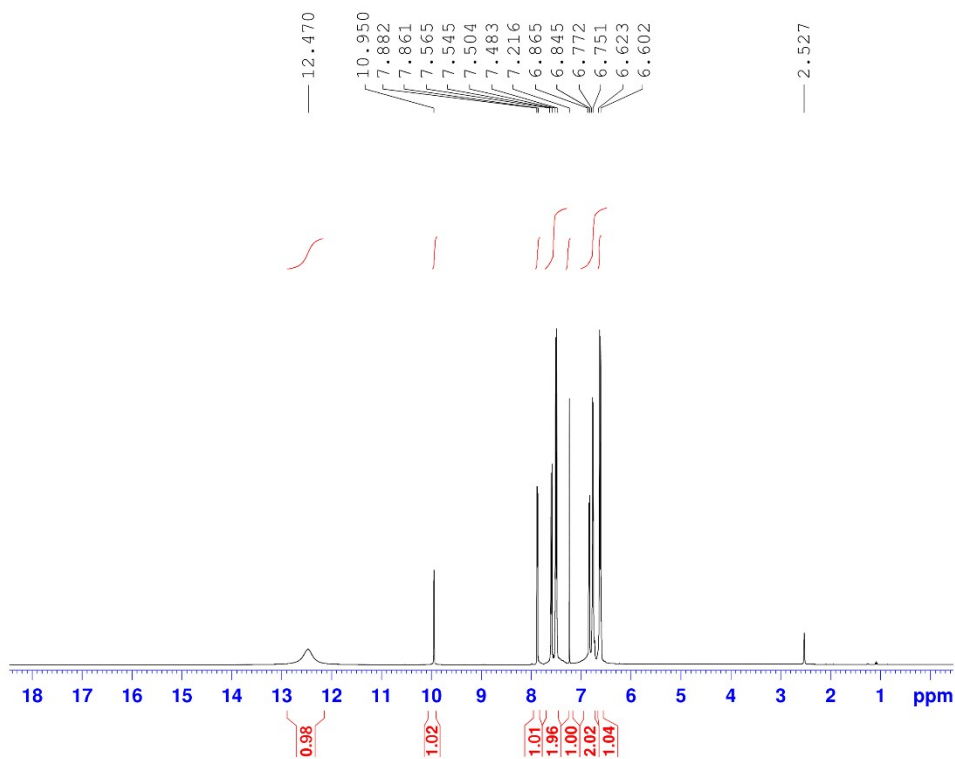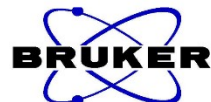

Sallahaddin-Kurdistan UN  
NMR  
EXPNO 210  
PROCNO 1  
Date\_ 20230414  
Time 19.11  
INSTRUM spect  
PROBHD 5 mm PABBO BB-  
PULPROG zg30  
TD 65536  
SOLVENT DMSO  
NS 20  
DS 0  
SWH 8012.820 Hz  
FIDRES 0.122266 Hz  
AQ 4.0894966 sec  
RG 57  
DW 62.400 usec  
DE 6.50 usec  
TE 294.3 K  
D1 4.0000000 sec  
TDO 1

CHANNEL f1  
NUC1 1H  
P1 14.00 usec  
PL1 -2.00 dB  
PL1W 11.8359408 W  
SFO1 400.2236020 MHz  
SI 32768  
SF 400.2200000 MHz  
WDW EM  
SSB 0  
LR 0.30 Hz  
GB 0  
FC 1.00

Fig.s6.1hnmr spectrum of 3a

Sample Code: D10

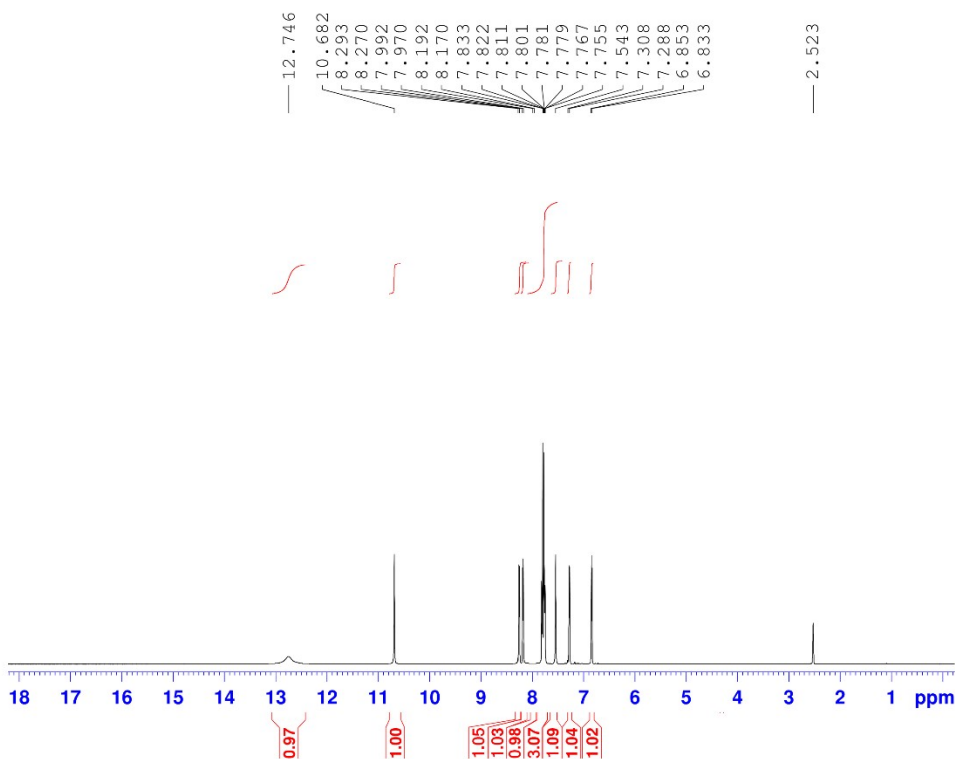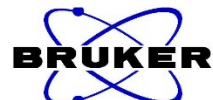

NAME Sallahaddin-Kurdistan UN  
EXPNO 209  
PROCNO 1  
Date\_ 20230414  
Time 9.57  
INSTRUM spect  
PROBHD 5 mm PABBO BB-  
PULPROG zg30  
TD 65536  
SOLVENT DMSO  
NS 20  
DS 0  
SWH 8012.820 Hz  
FIDRES 0.122266 Hz  
AQ 4.0894966 sec  
RG 90.5  
DW 62.400 usec  
DE 6.50 usec  
TE 294.8 K  
D1 4.00000000 sec  
TDO 1

----- CHANNEL f1 -----  
NUC1 1H  
P1 14.00 usec  
PL1 -2.00 dB  
PL1W 11.86359406 W  
SF01 400.2236020 MHz  
SI 32768  
SF 400.2200000 MHz  
WDW EM  
SSB 0  
LB 0.30 Hz  
GB 0  
PC 1.00

Fig.S7.1hnmr 3b

Sample Code: S-1-

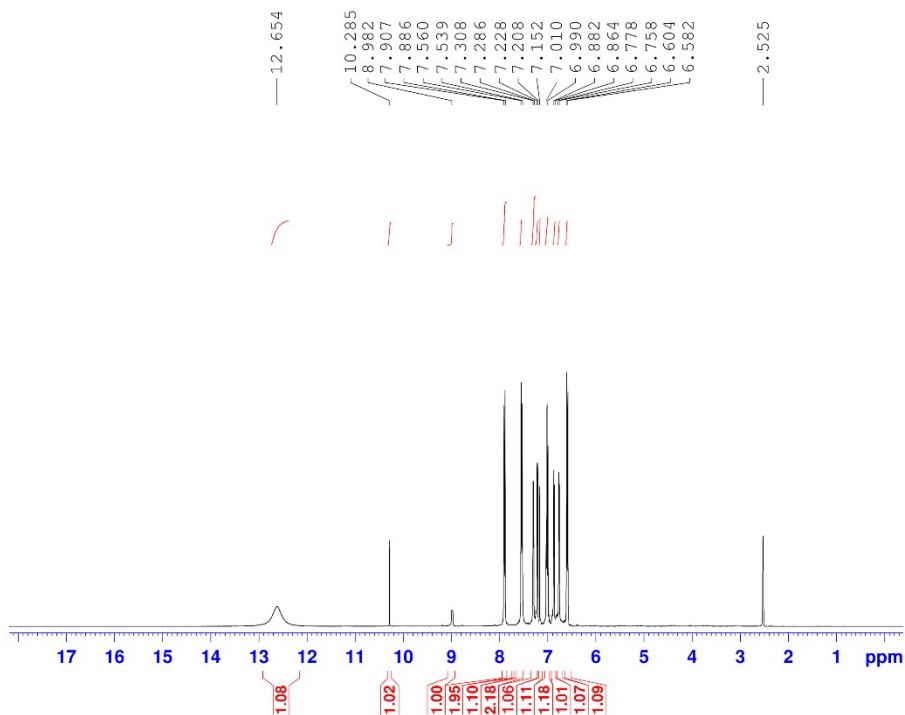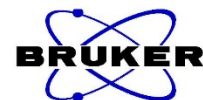

NAME Sallahaddin-Kurdistan UN  
EXPNO 201  
PROCNO 1  
Date\_ 20230414  
Time 8.26  
INSTRUM spect  
PROBHD 5 mm PABBO BB-  
PULPROG zg30  
TD 65536  
SOLVENT DMSO  
NS 20  
DS 0  
SWH 8012.820 Hz  
FIDRES 0.122266 Hz  
AQ 4.0894966 sec  
RG 90.5  
DW 62.400 usec  
DE 6.50 usec  
TE 294.8 K  
D1 4.00000000 sec  
TDO 1

----- CHANNEL f1 -----  
NUC1 1H  
P1 14.00 usec  
PL1 -2.00 dB  
PL1W 11.86359406 W  
SF01 400.2236020 MHz  
SI 32768  
SF 400.2200000 MHz  
WDW EM  
SSB 0  
LB 0.30 Hz  
GB 0  
PC 1.00

Fig.S8.1hnmr spectrum of 3c

Sample Code: S-12- in DMSO (Mr.Sangar Hassaan)

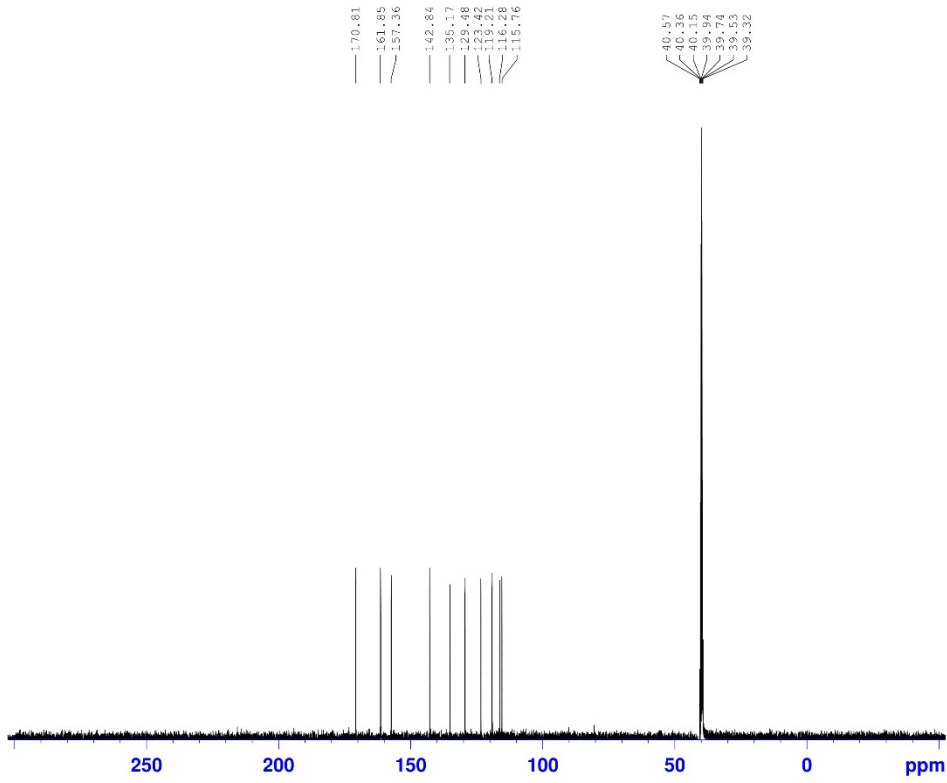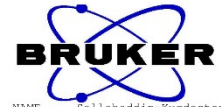

```
NAME Sallahaddin-Kurdistan UN
EXPNO 135
PROCNO 1
Date_ 20230225
Time 8.17
INSTRUM spect
PROBHD 5 mm PABBO BBO
PULPROG zgpg30
TD 65536
SOLVENT DMSO
NS 76
DS 0
SWH 35714.285 Hz
FIDRES 0.544957 Hz
AQ 0.9175340 sec
RG 2050
DW 14.000 usec
DE 6.50 usec
TE 293.0 K
D1 1.00000000 sec
D11 0.03000000 sec
TD0 1

===== CHANNEL f1 =====
NUC1 13C
P1 9.00 usec
PL1 -0.50 dB
PL1W 42.02801895 W
SFO1 100.6479784 MHz

===== CHANNEL f2 =====
CPDPRG2 waltz16
NUC2 1H
PCPD2 90.00 usec
PF2 -2.00 dB
PL12 14.16 dB
PL13 17.90 dB
PL2W 11.86359406 W
PL12W 0.28722104 W
PL13W 0.12139934 W
SFO2 400.2216009 MHz
SI 32768
SF 100.6353990 MHz
WDW EM
SBB 0
LB 1.00 Hz
GB 0
PC 1.40
```

Fig.S9. 13CNMR spectrum of 3

Sample Code:S-2

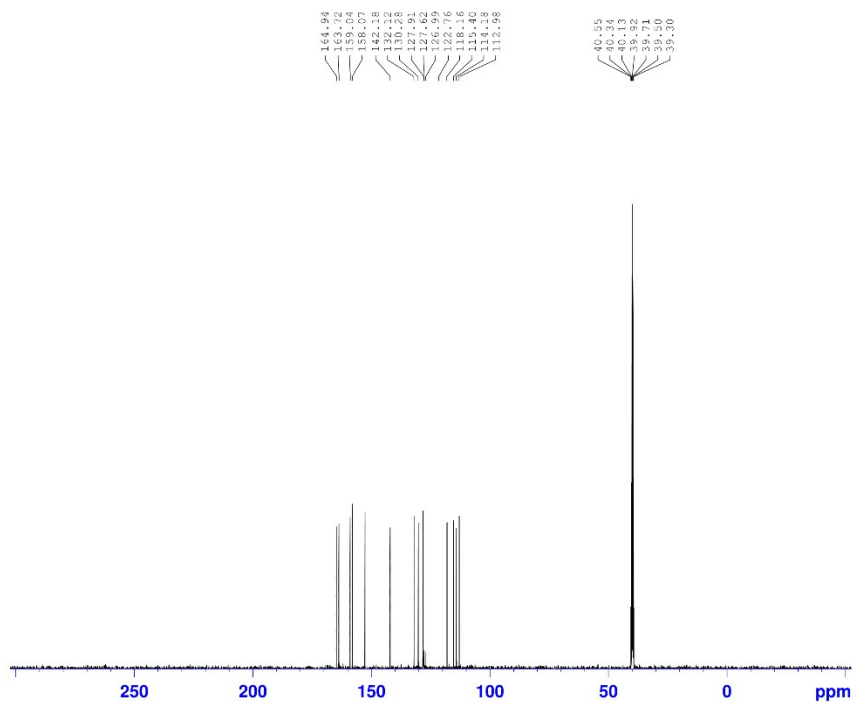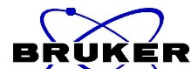

```
NAME Sallahaddin-Kurdistan UN
EXPNO 274
PROCNO 1
Date_ 20230420
Time 10.34
INSTRUM spect
PROBHD 5 mm PABBO B3-
PULPROG zgpg30
ID 65536
SOLVENT DMSO
NS 144
DS 0
SWH 35714.285 Hz
FIDRES 0.544957 Hz
AQ 0.9175540 sec
RG 2050
DW 14.000 usec
DE 6.50 usec
TE 295.7 K
D1 1.00000000 sec
D11 0.03000000 sec
TDO 1

===== CHANNEL f1 =====
NUC1 13C
P1 9.00 usec
PL1 -0.90 dB
PL1W 42.02801895 W
SFO1 100.6479784 MHz

===== CHANNEL f2 =====
CPDPRG2 waltz16
NUC2 1H
PCPD2 90.00 usec
PL2 -2.00 dB
PL12 14.16 dB
PL13 17.90 dB
PL2W 11.86359406 W
PL12W 0.28722104 W
PL13W 0.12139934 W
SFO2 400.2216009 MHz
SI 32768
SF 100.6353990 MHz
WDW EM
SBB 0
LB 1.00 Hz
GB 0
PC 1.40
```

Fig.S10. 13CNMR spectrum of 3a

Sample Code:D10

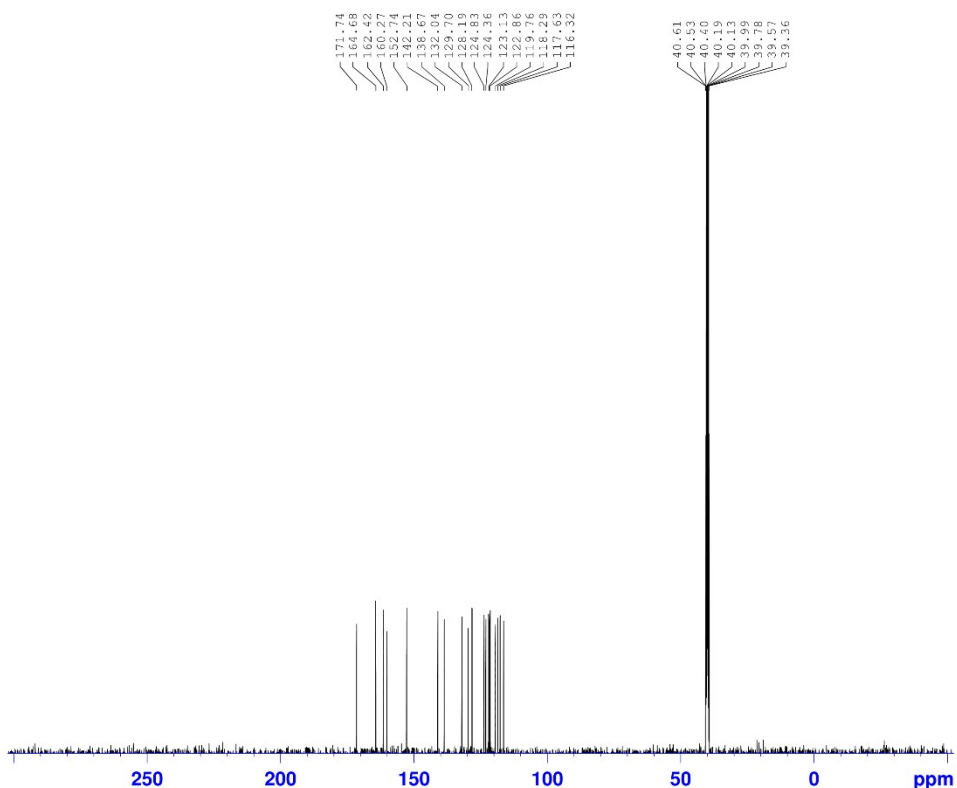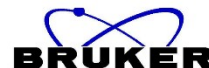

```
NAME Sallahaddin-Kurdistan UN
EXPNO 272
PROCNO 1
Date_ 20230420
Time 10.07
INSTRUM spect
PROBHD 5 mm PABBO B3-
PULPROG zgpg30
TD 65536
SOLVENT DMSO
NS 551
DS 0
SWH 35714.285 Hz
FIDRES 0.544957 Hz
AQ 0.9175540 sec
RG 2050
DW 14.000 usec
DE 6.50 usec
TE 295.7 K
D1 1.00000000 sec
D11 0.03000000 sec
TDO 1

===== CHANNEL f1 =====
NUC1 13C
P1 9.00 usec
PL1 -0.90 dB
PL1W 42.02801895 W
SFO1 100.6479784 MHz

===== CHANNEL f2 =====
CPDPRG2 waltz16
NUC2 1H
PCPD2 90.00 usec
PL2 -2.00 dB
PL12 14.16 dB
PL13 17.90 dB
PL2W 11.86359406 W
PL12W 0.28722104 W
PL13W 0.12139934 W
SFO2 400.2216009 MHz
SI 32768
SF 100.6353990 MHz
WDW EM
SBB 0
LB 1.00 Hz
GB 0
PC 1.40
```



Fig.S11. <sup>13</sup>CNMR spectrum of 3b

Sample Code:S-1-

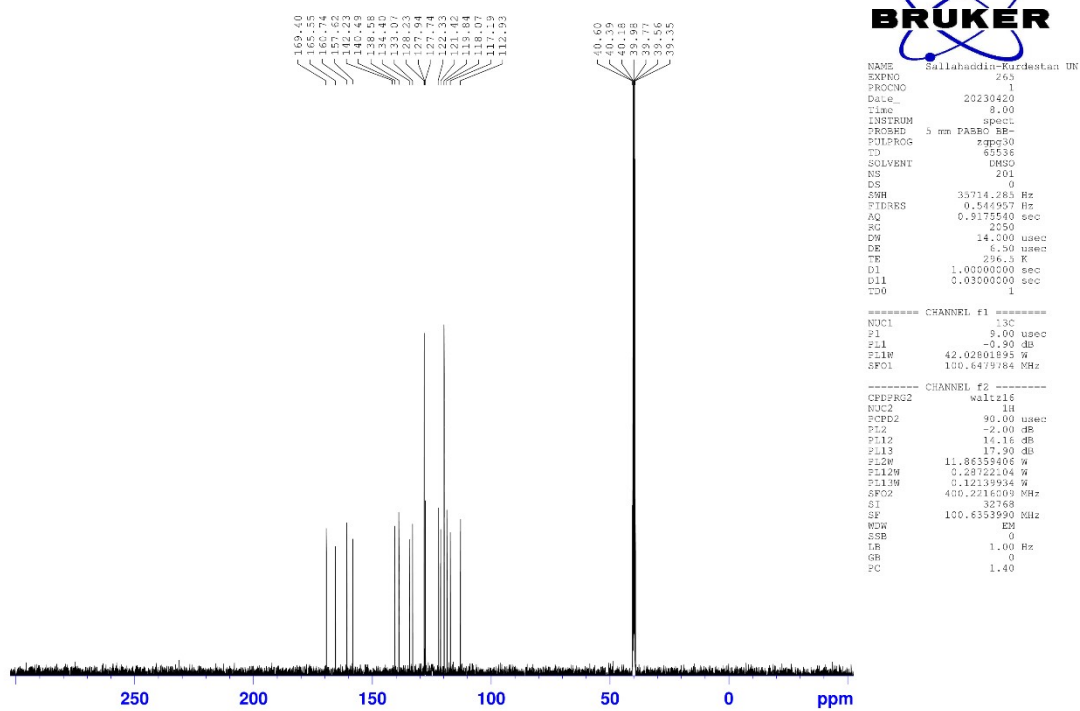

Fig.S12. <sup>13</sup>CNMR spectrum of 3c

**Acquisition Parameter**

|             |            |                       |           |                  |           |
|-------------|------------|-----------------------|-----------|------------------|-----------|
| Source Type | ESI        | Ion Polarity          | Positive  | Set Nebulizer    | 4.4 psi   |
| Focus       | Not active | Set Capillary         | 3800 V    | Set Dry Heater   | 180 °C    |
| Scan Begin  | 50 m/z     | Set End Plate Offset  | -500 V    | Set Dry Gas      | 4.0 l/min |
| Scan End    | 600 m/z    | Set Collision Cell RF | 350.0 Vpp | Set Divert Valve | Waste     |

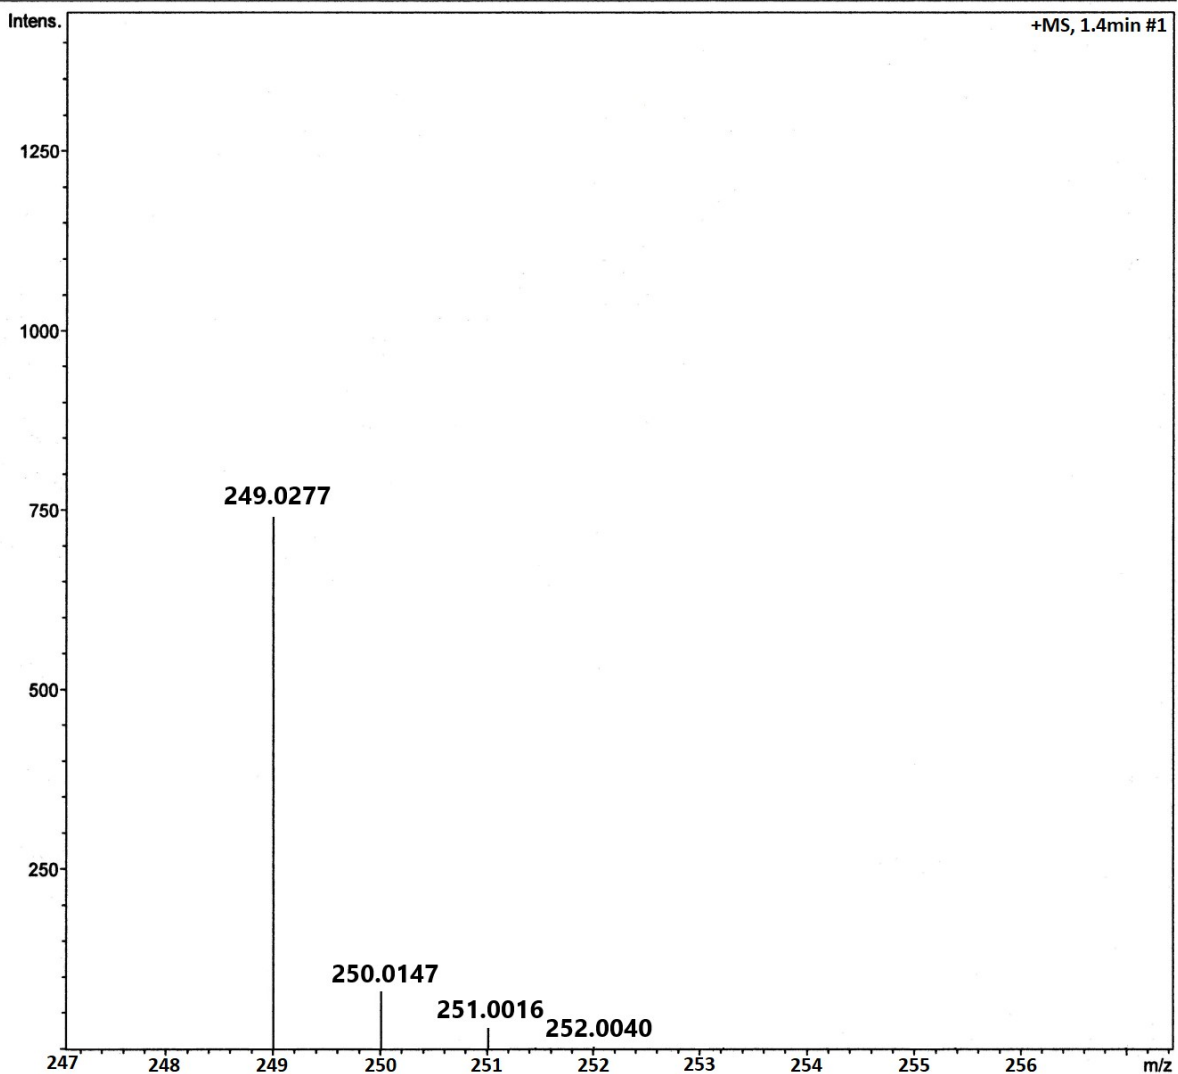

Fig.S13. HRMS spectrum of 3

**Acquisition Parameter**

|             |            |                       |           |                  |           |
|-------------|------------|-----------------------|-----------|------------------|-----------|
| Source Type | ESI        | Ion Polarity          | Positive  | Set Nebulizer    | 4.4 psi   |
| Focus       | Not active | Set Capillary         | 3800 V    | Set Dry Heater   | 180 °C    |
| Scan Begin  | 50 m/z     | Set End Plate Offset  | -500 V    | Set Dry Gas      | 4.0 l/min |
| Scan End    | 600 m/z    | Set Collision Cell RF | 350.0 Vpp | Set Divert Valve | Waste     |

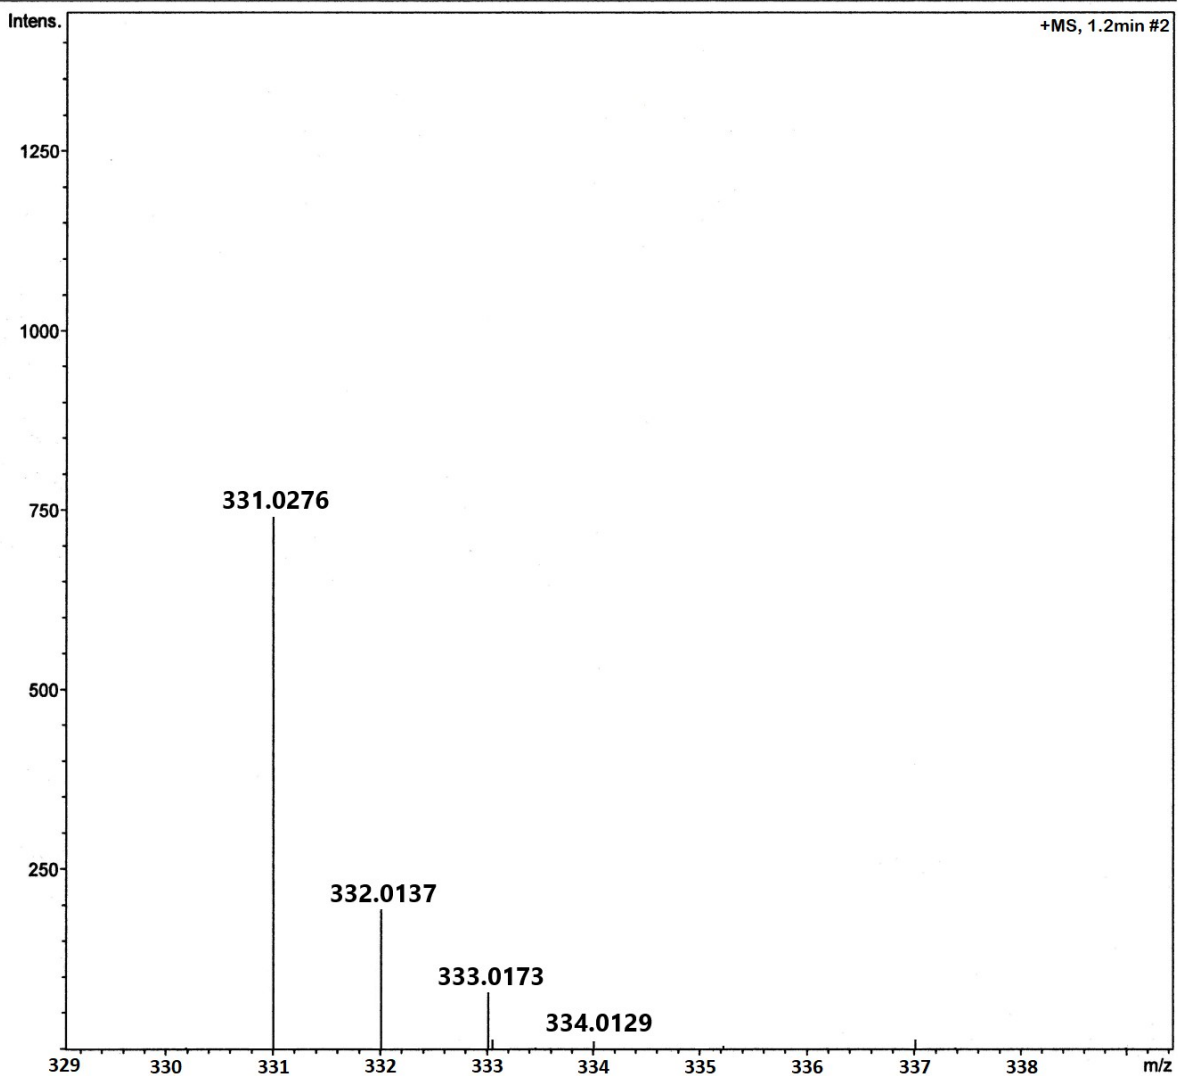

Fig.S14. HRMS spectrum of 3a

**Acquisition Parameter**

|             |            |                       |           |                  |           |
|-------------|------------|-----------------------|-----------|------------------|-----------|
| Source Type | ESI        | Ion Polarity          | Positive  | Set Nebulizer    | 4.4 psi   |
| Focus       | Not active | Set Capillary         | 3800 V    | Set Dry Heater   | 180 °C    |
| Scan Begin  | 50 m/z     | Set End Plate Offset  | -500 V    | Set Dry Gas      | 4.0 l/min |
| Scan End    | 600 m/z    | Set Collision Cell RF | 350.0 Vpp | Set Divert Valve | Waste     |

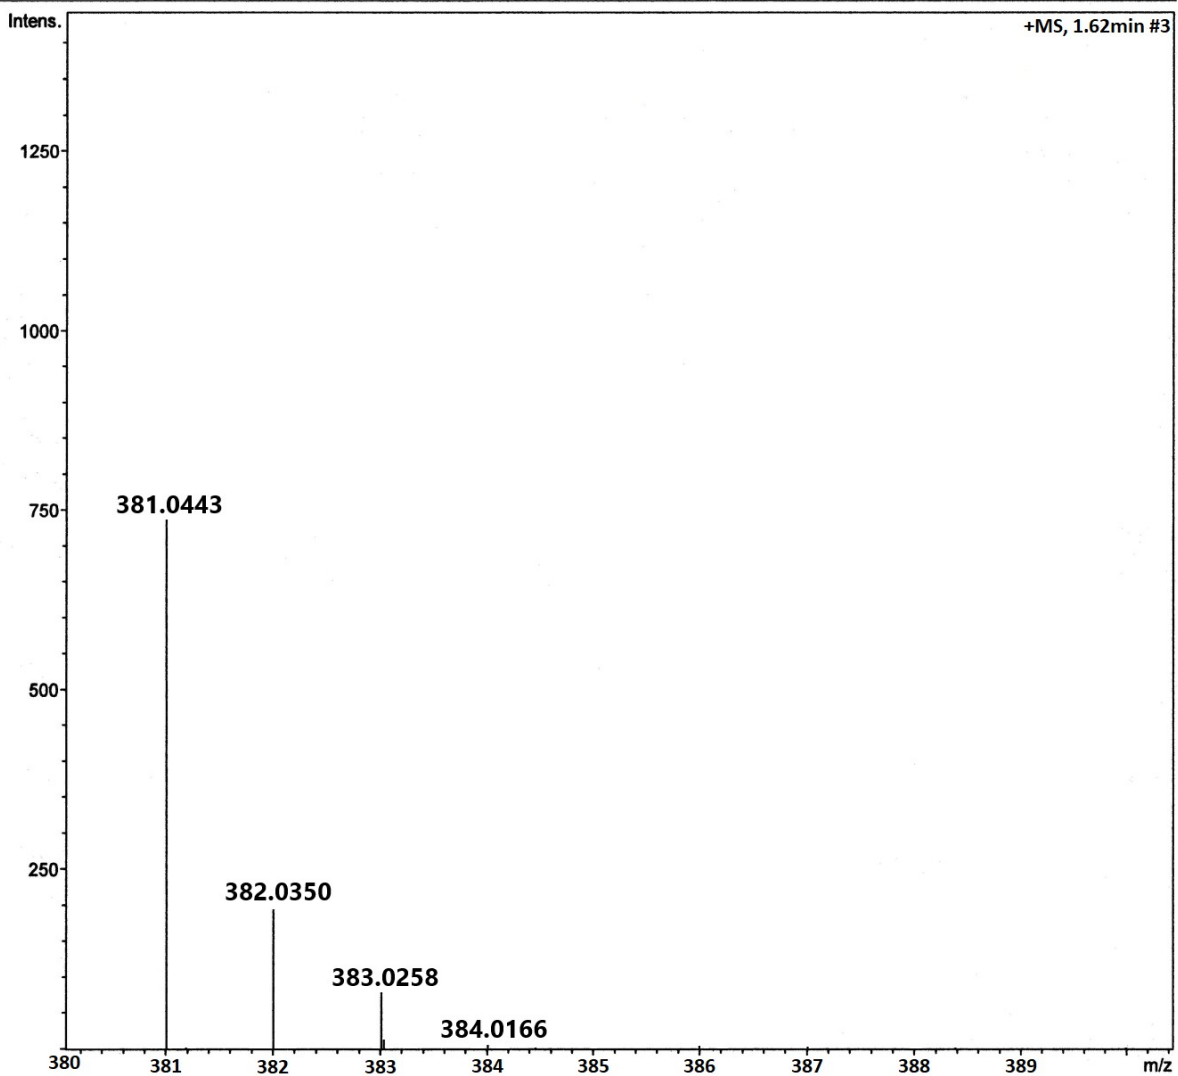

Fig.S15. HRMS spectrum of 3b

**Acquisition Parameter**

|             |            |                       |           |                  |           |
|-------------|------------|-----------------------|-----------|------------------|-----------|
| Source Type | ESI        | Ion Polarity          | Positive  | Set Nebulizer    | 4.4 psi   |
| Focus       | Not active | Set Capillary         | 3800 V    | Set Dry Heater   | 180 °C    |
| Scan Begin  | 50 m/z     | Set End Plate Offset  | -500 V    | Set Dry Gas      | 4.0 l/min |
| Scan End    | 600 m/z    | Set Collision Cell RF | 350.0 Vpp | Set Divert Valve | Waste     |

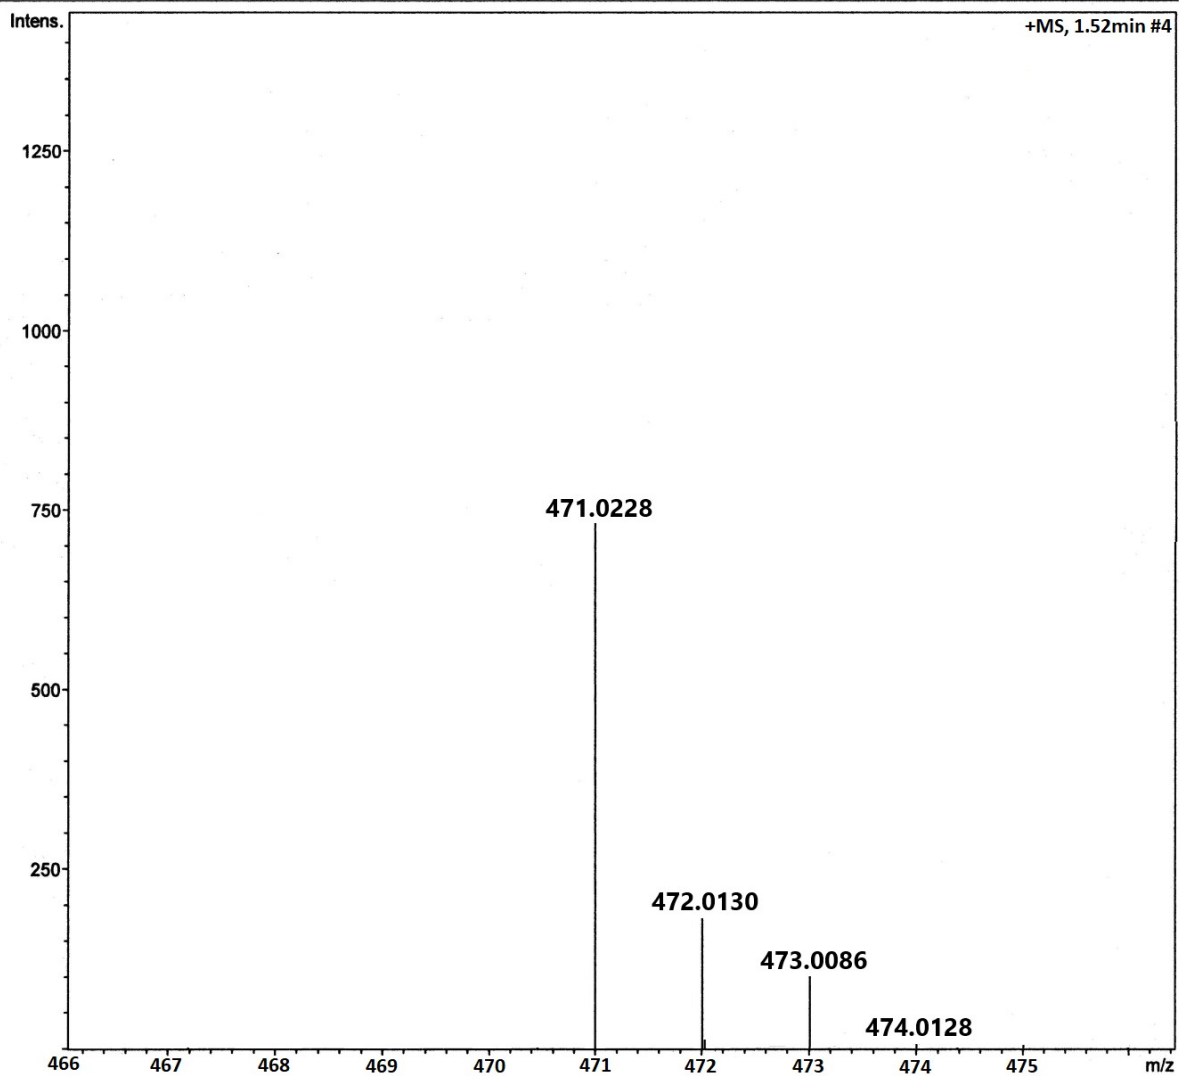

Fig.S16. HRMS spectrum of 3c

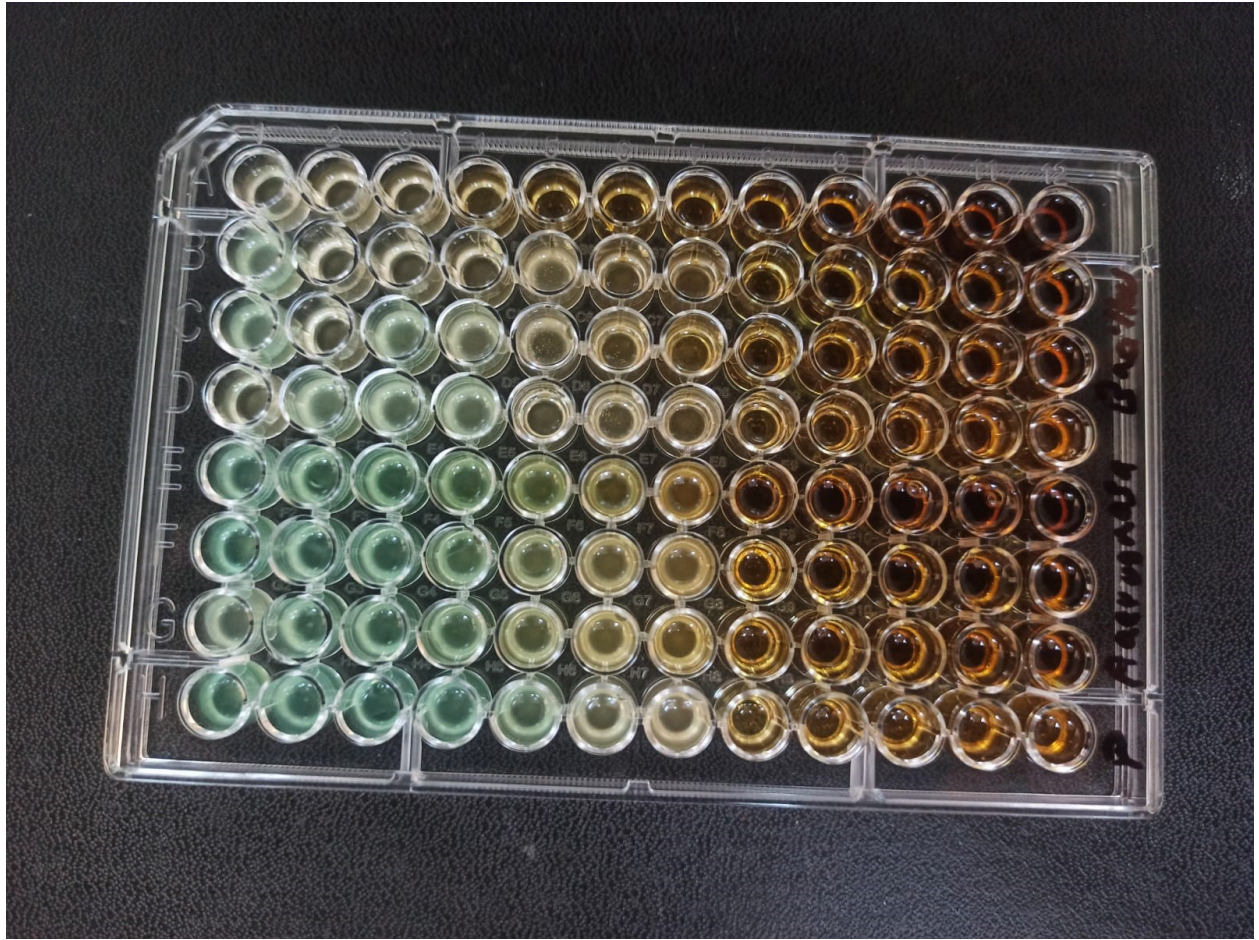

Fig.S17.MIC OF 3 and 3a-c against *Pseudomonas aeruginosa* and *Bacillus cereus*



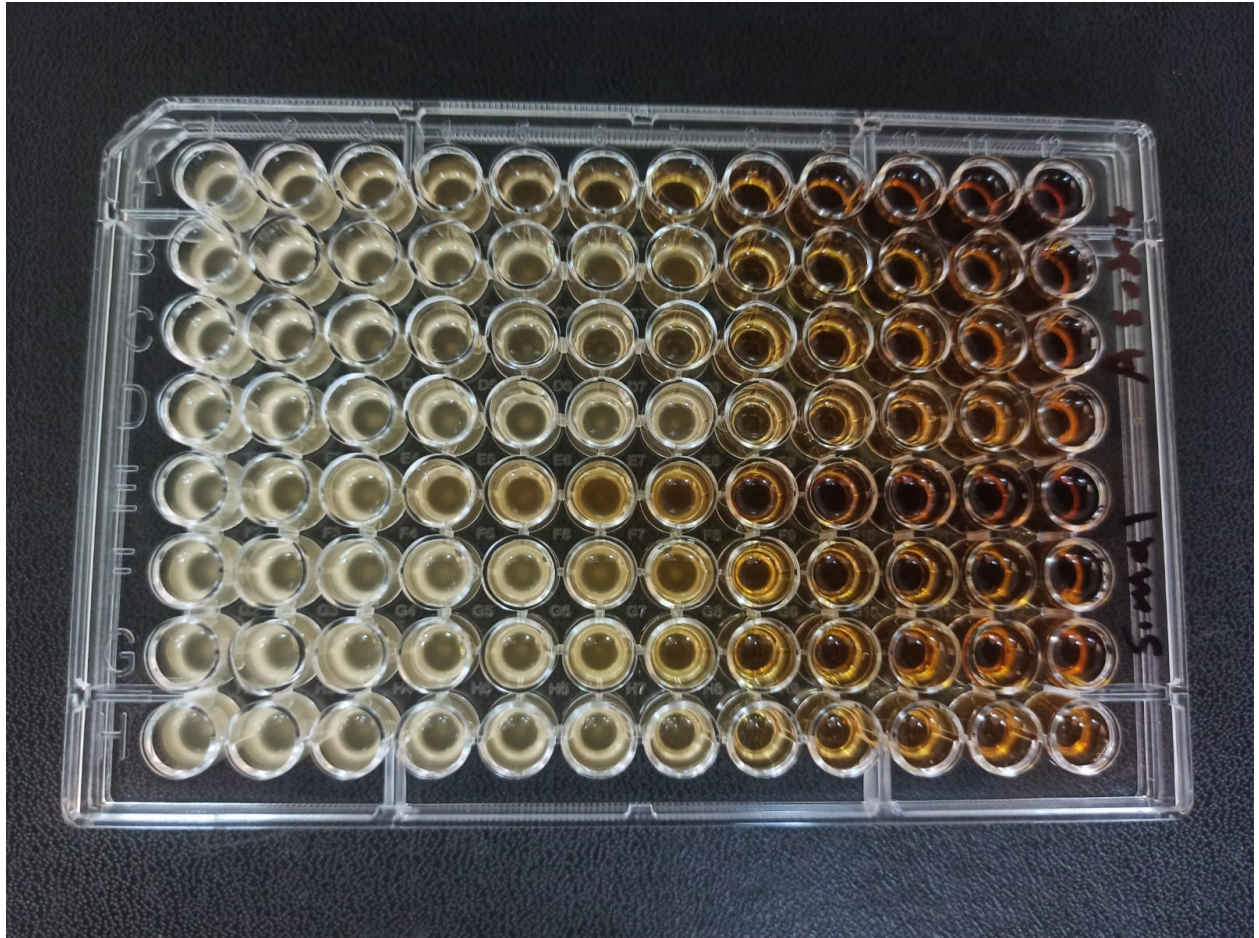

Fig.S18.MIC OF 3 and 3a-c against *Stenotrophomonas maltophilia* and *Aeromonas sobria*

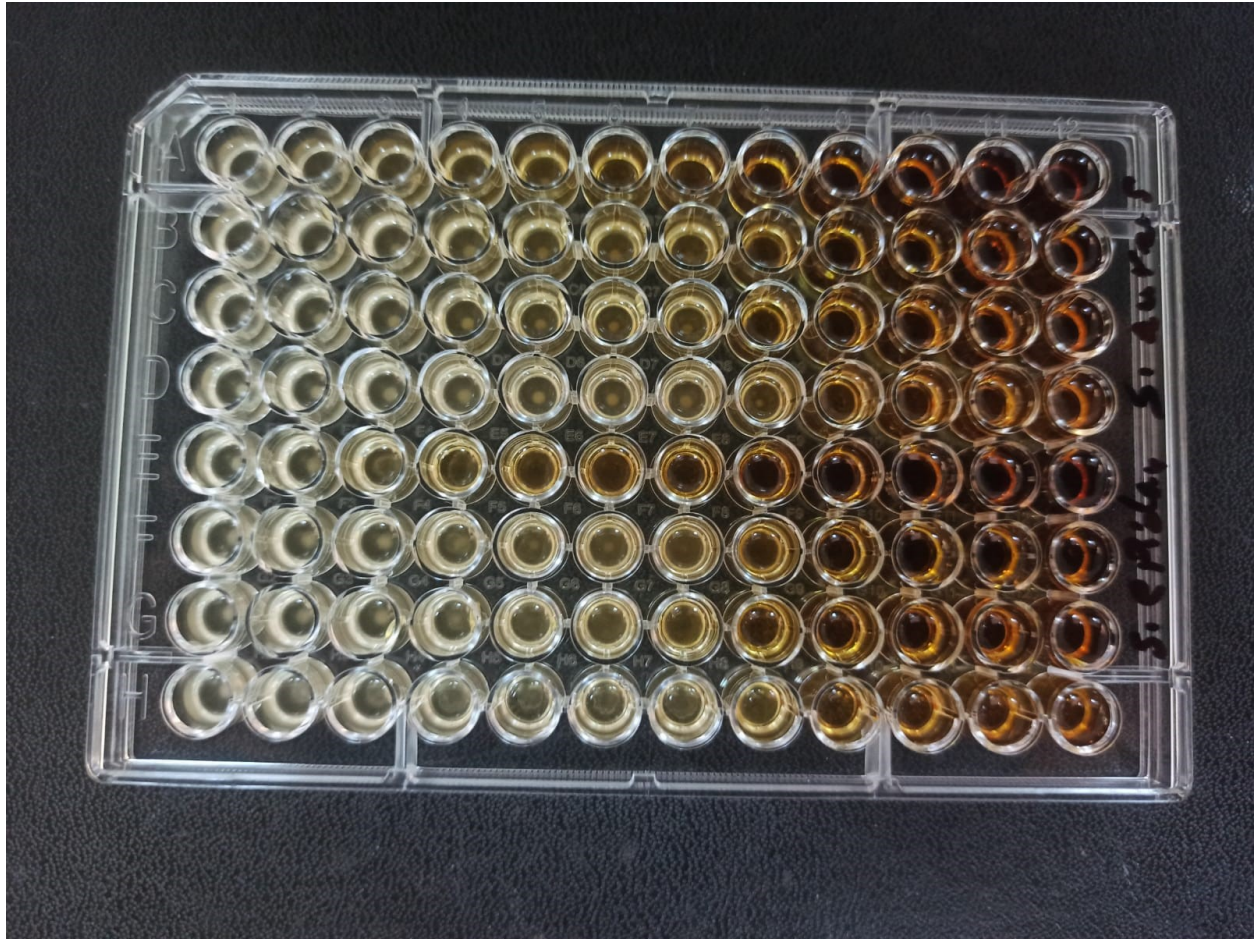

*Fig.S19.MIC OF 3 and 3a-c against Staphylococcus aureus and Staphylococcus epidermidis*



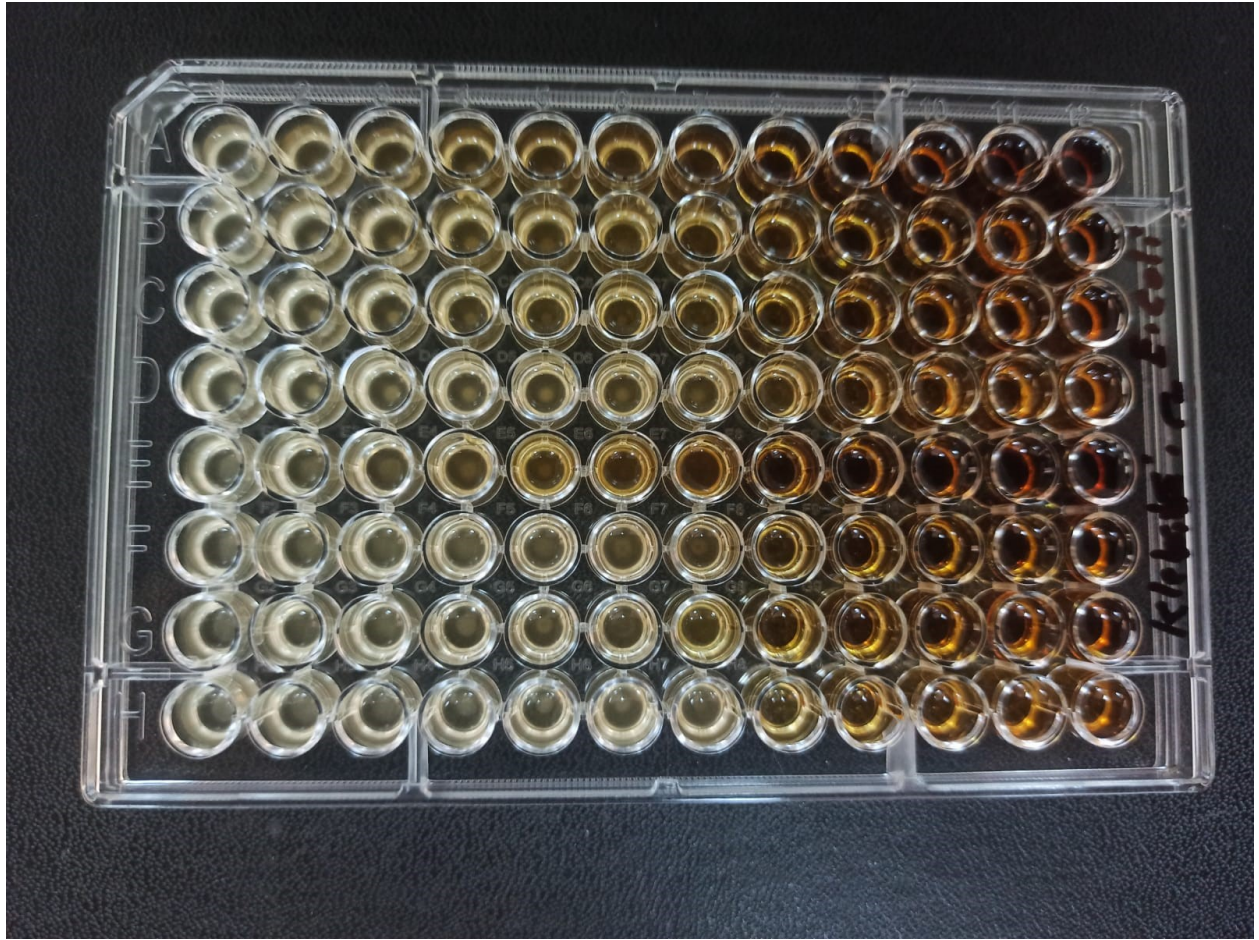

*Fig.S20.MIC OF 3 and 3a-c against klebsiella pneumoniae. and Escherichia coli*

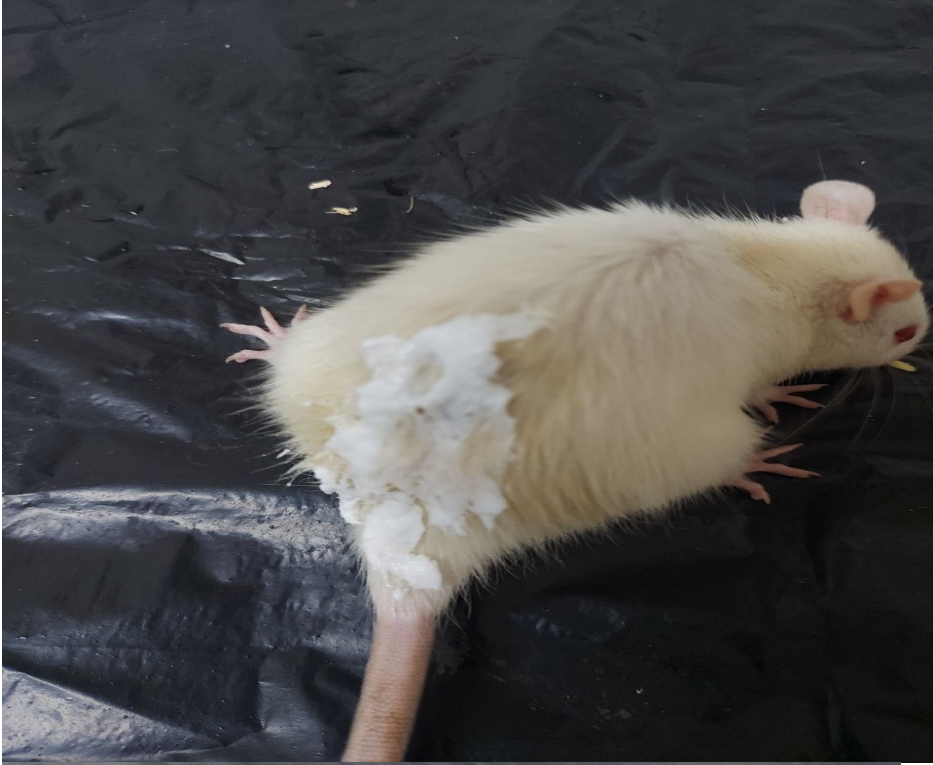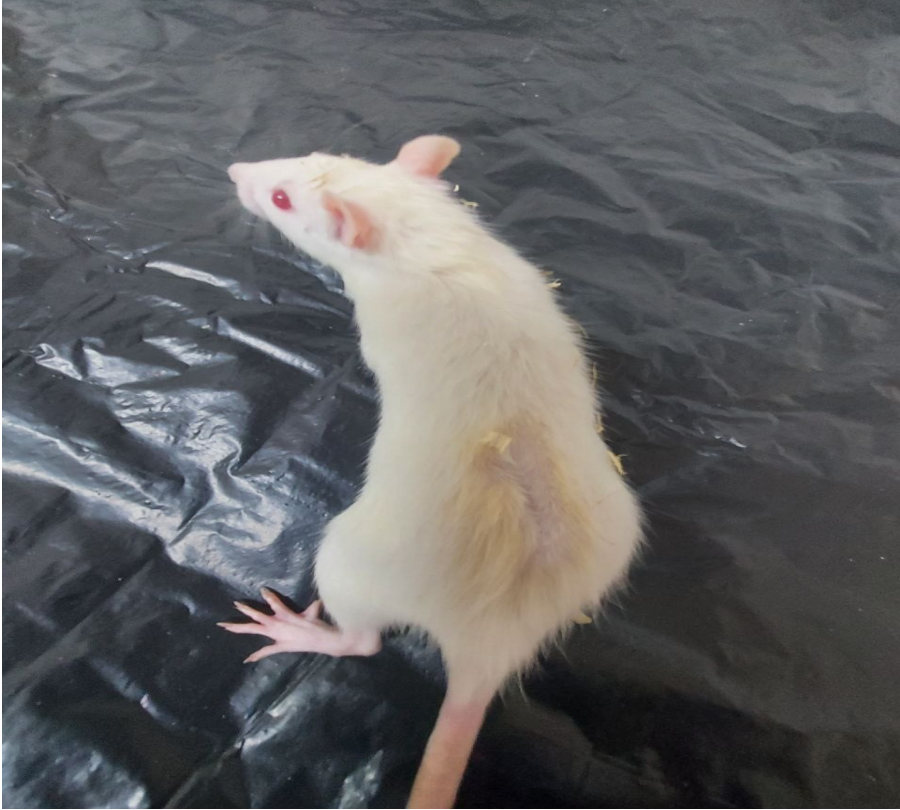



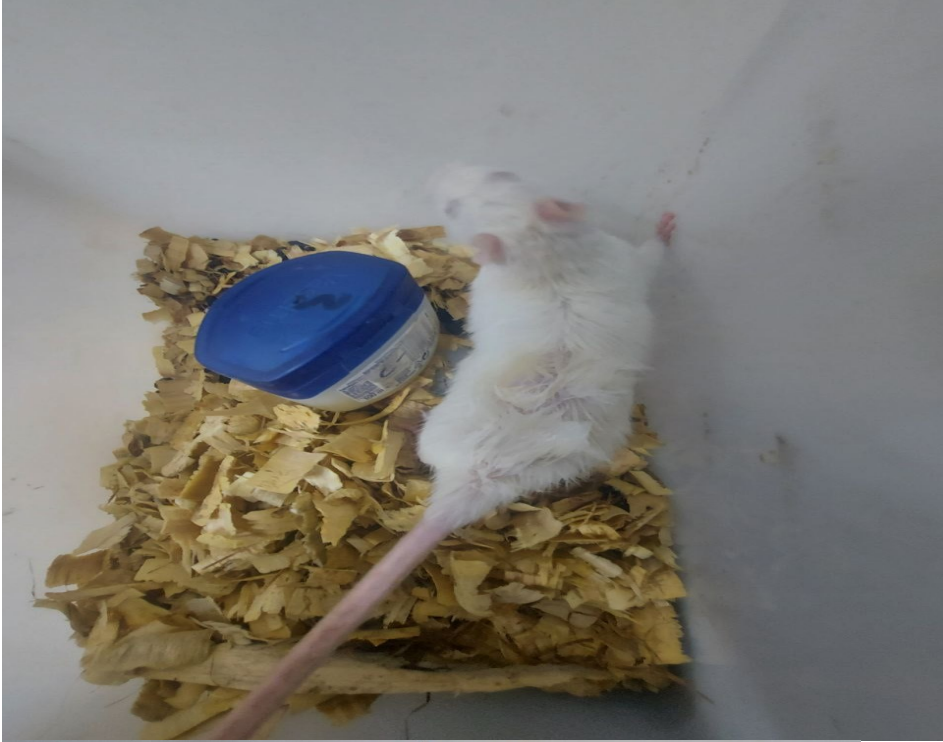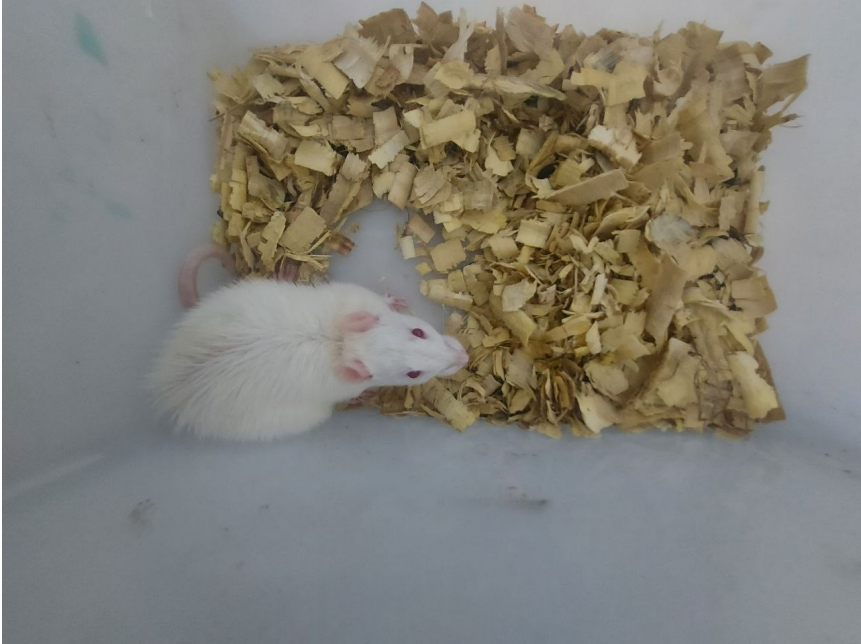

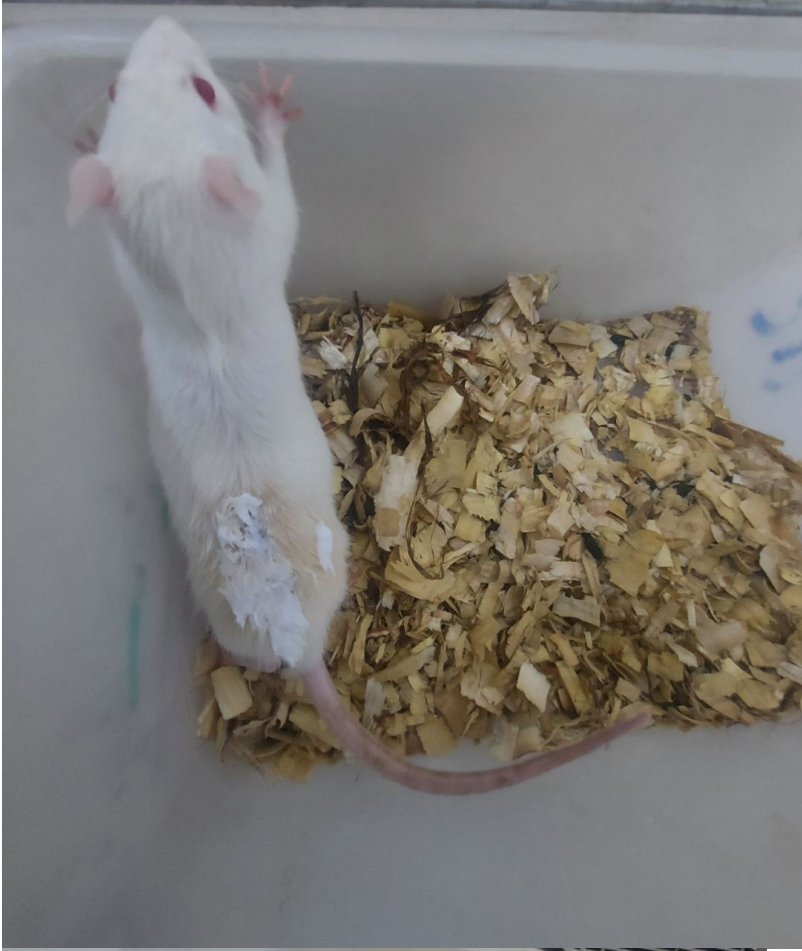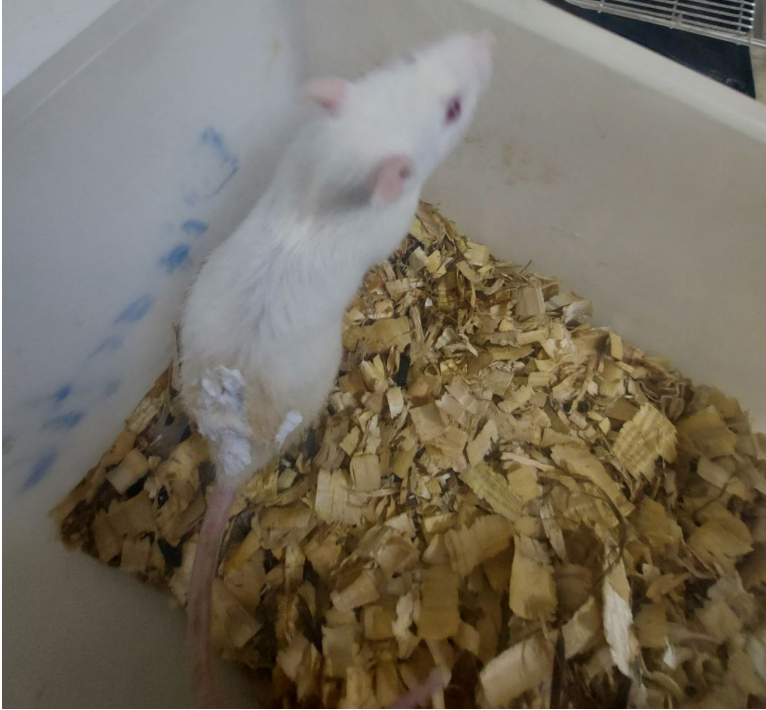

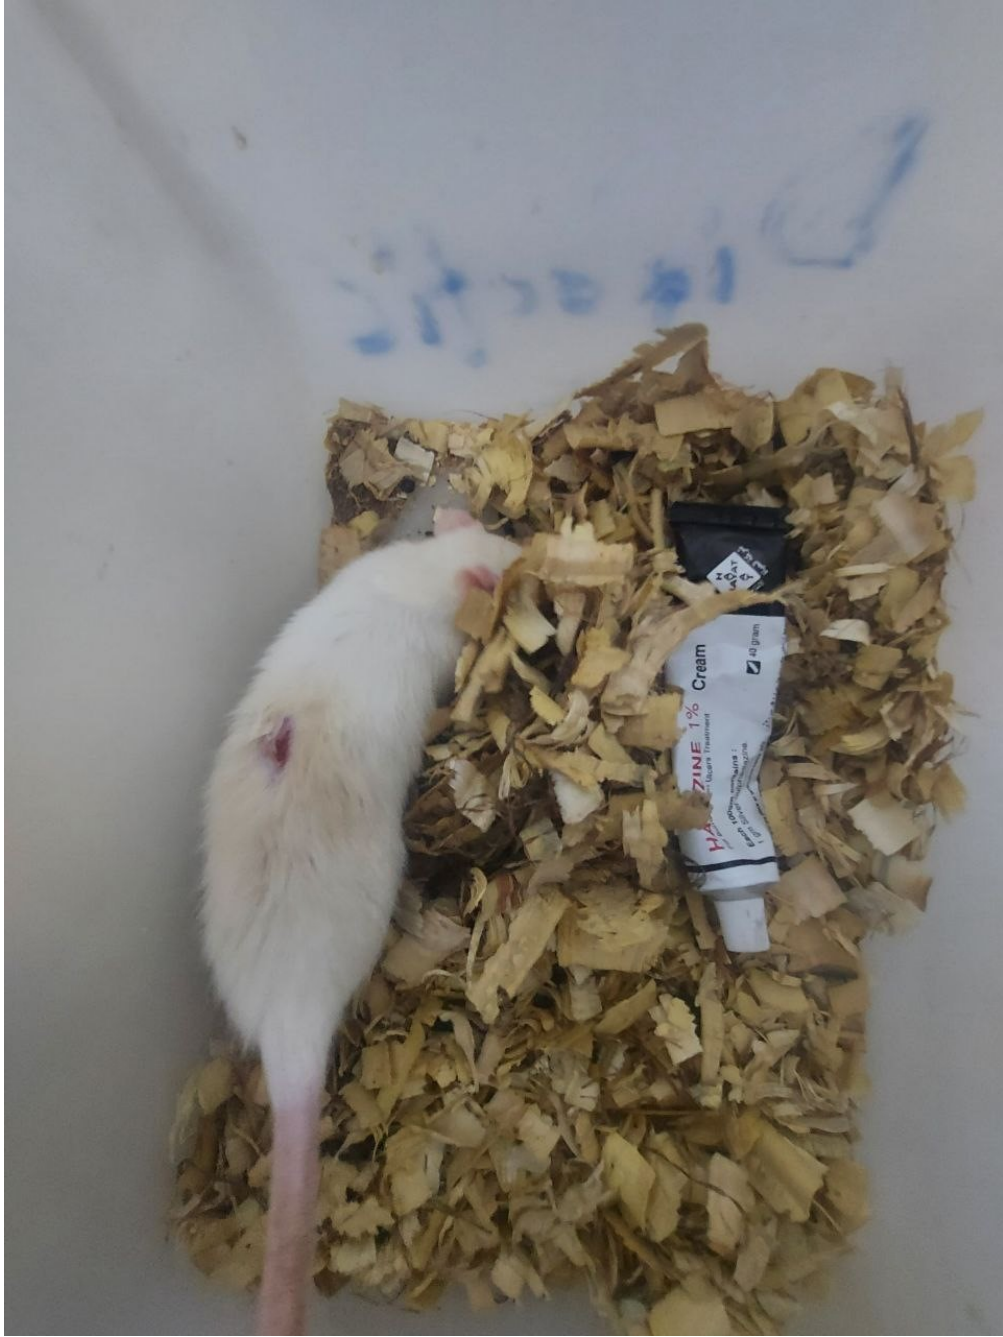

*Fig.S21-S26: Standard drug and -ve control*



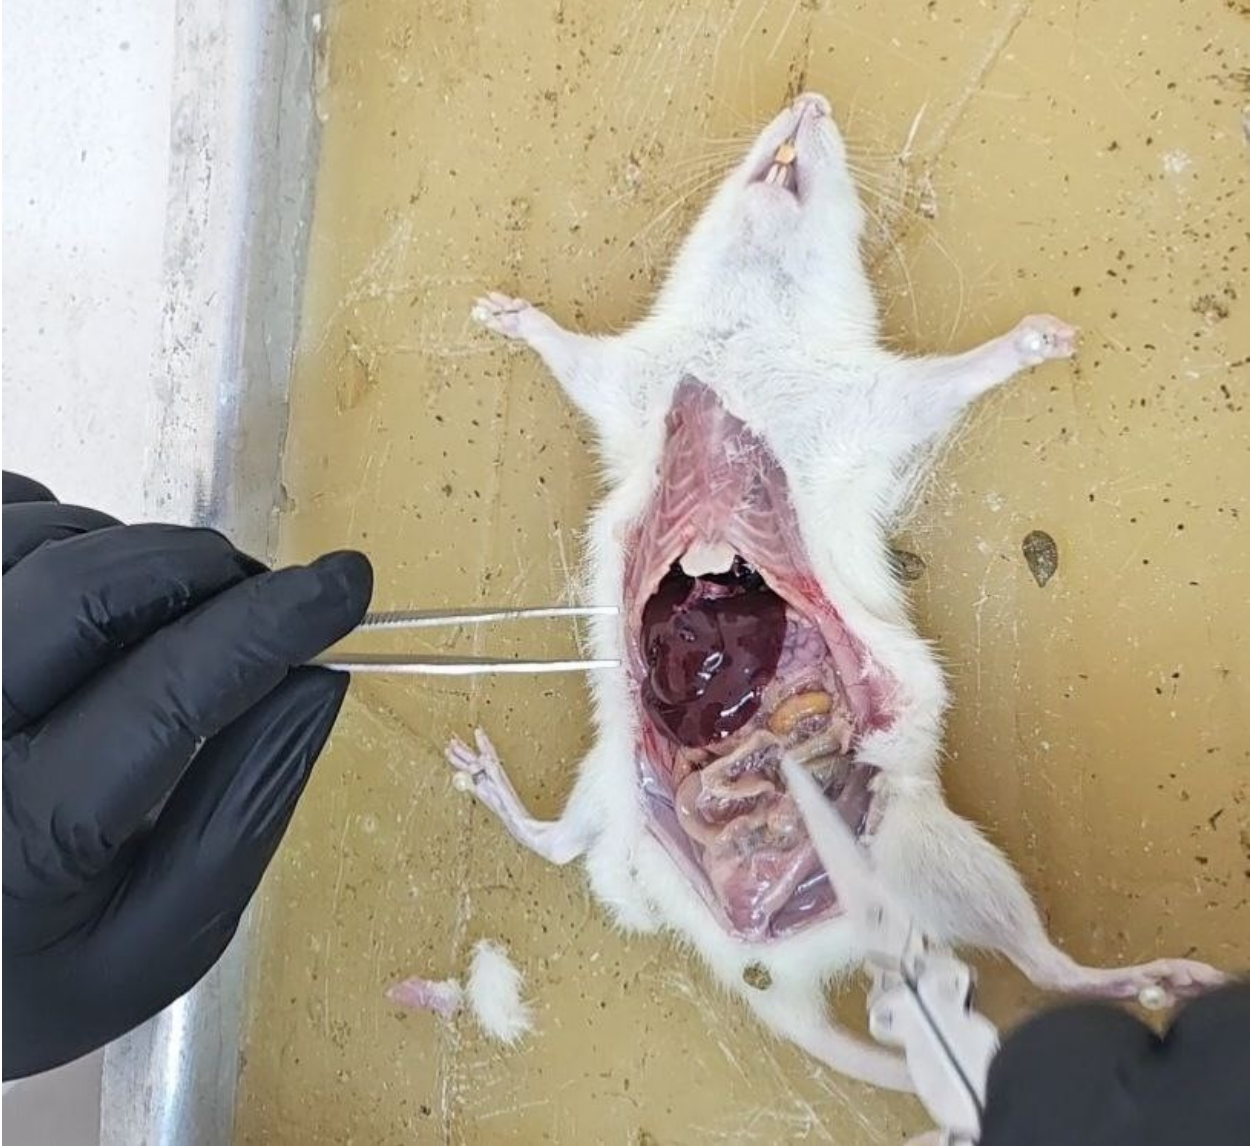

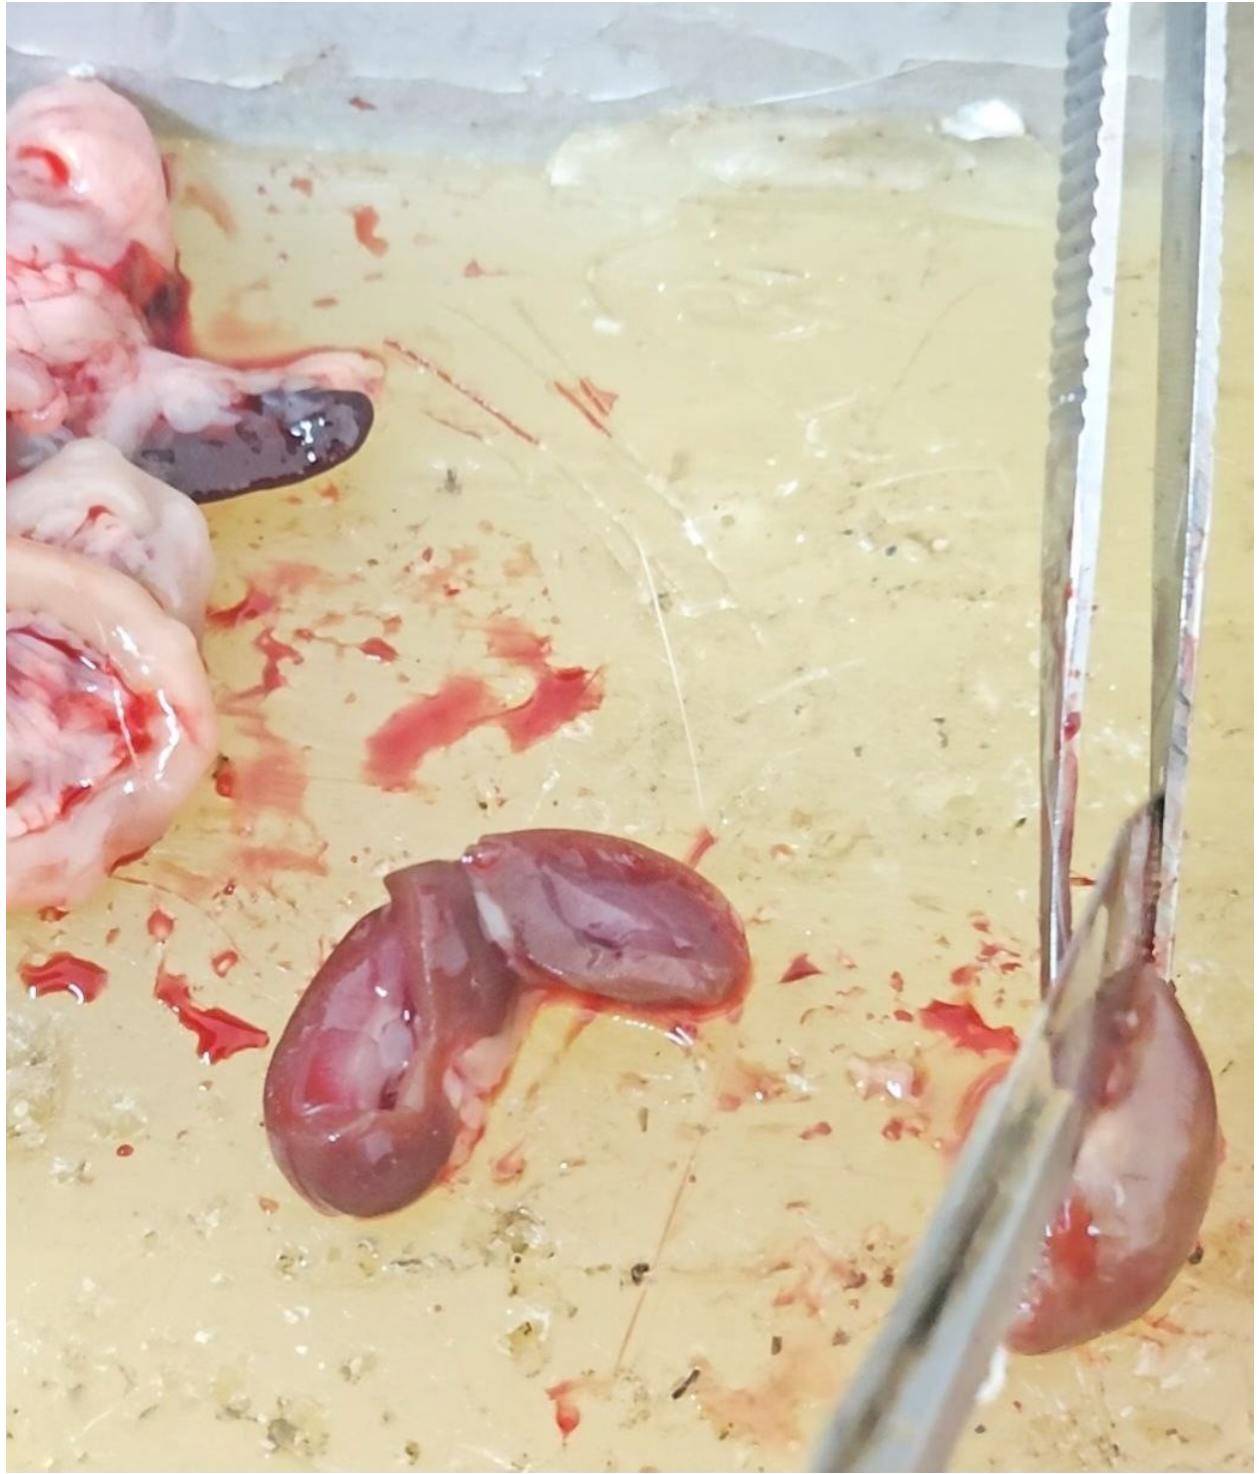

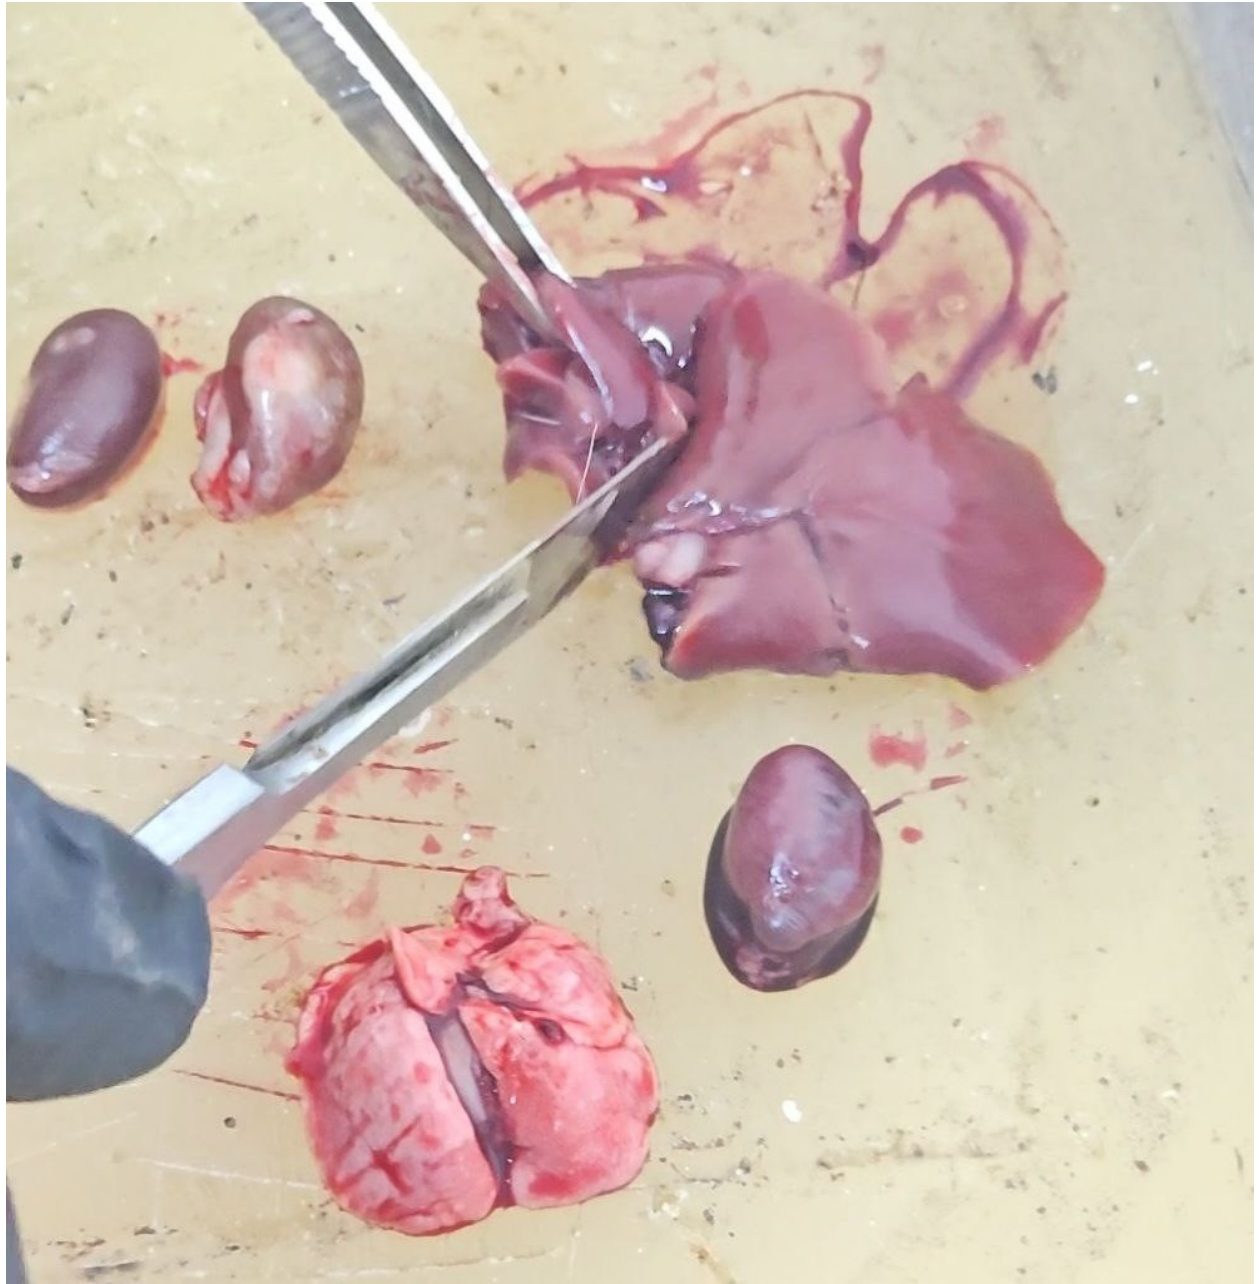



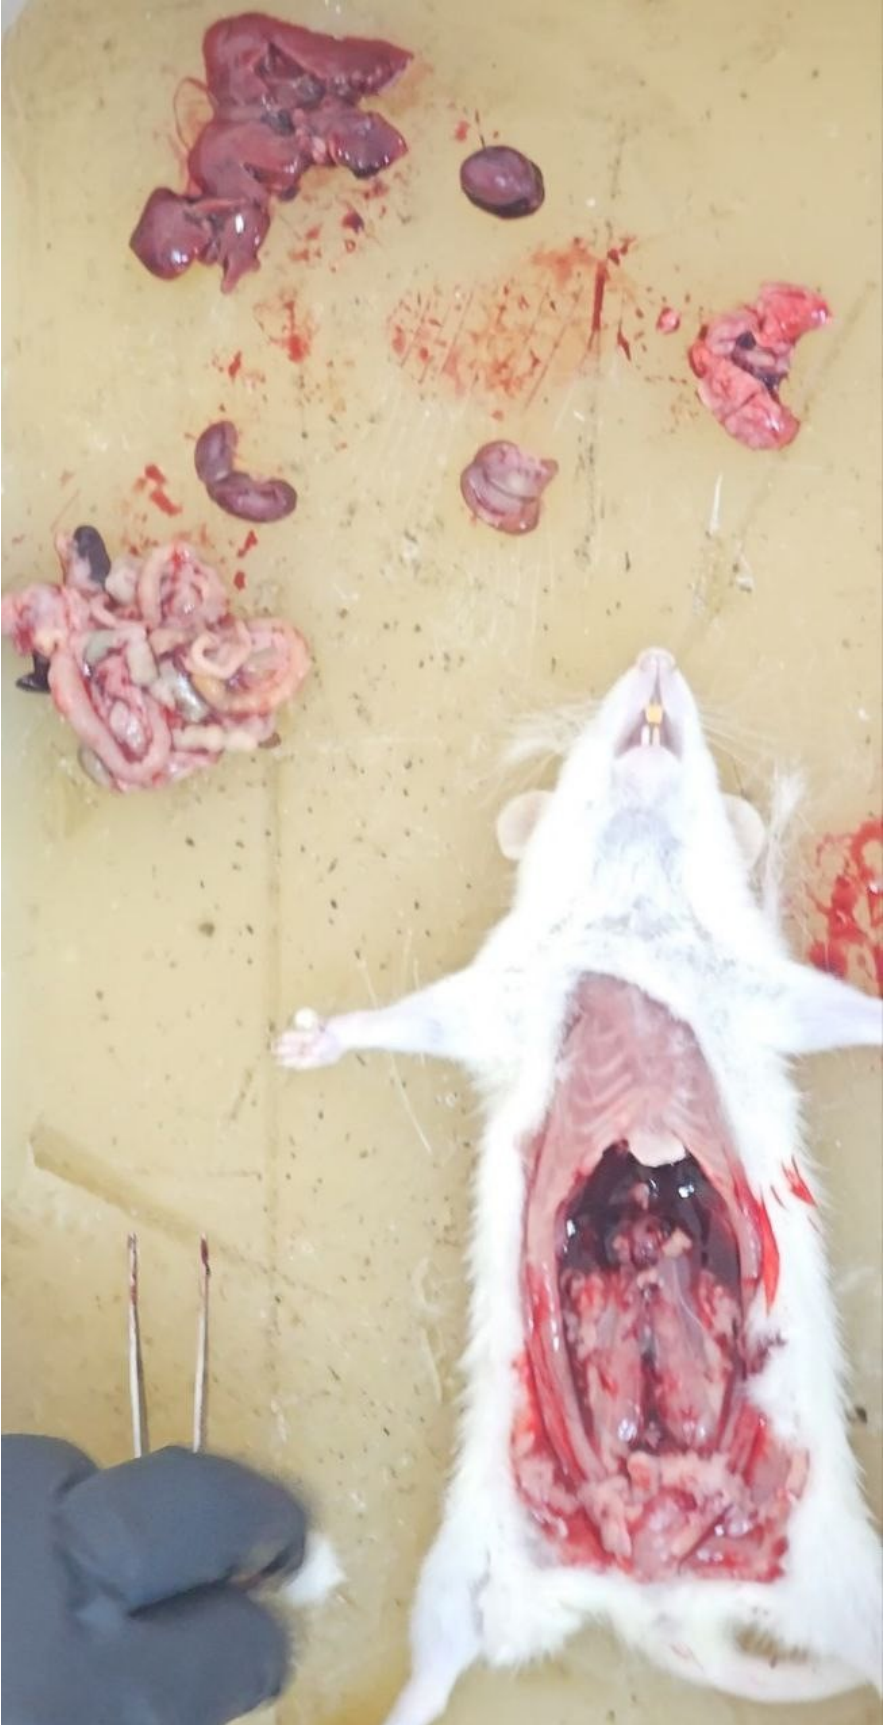

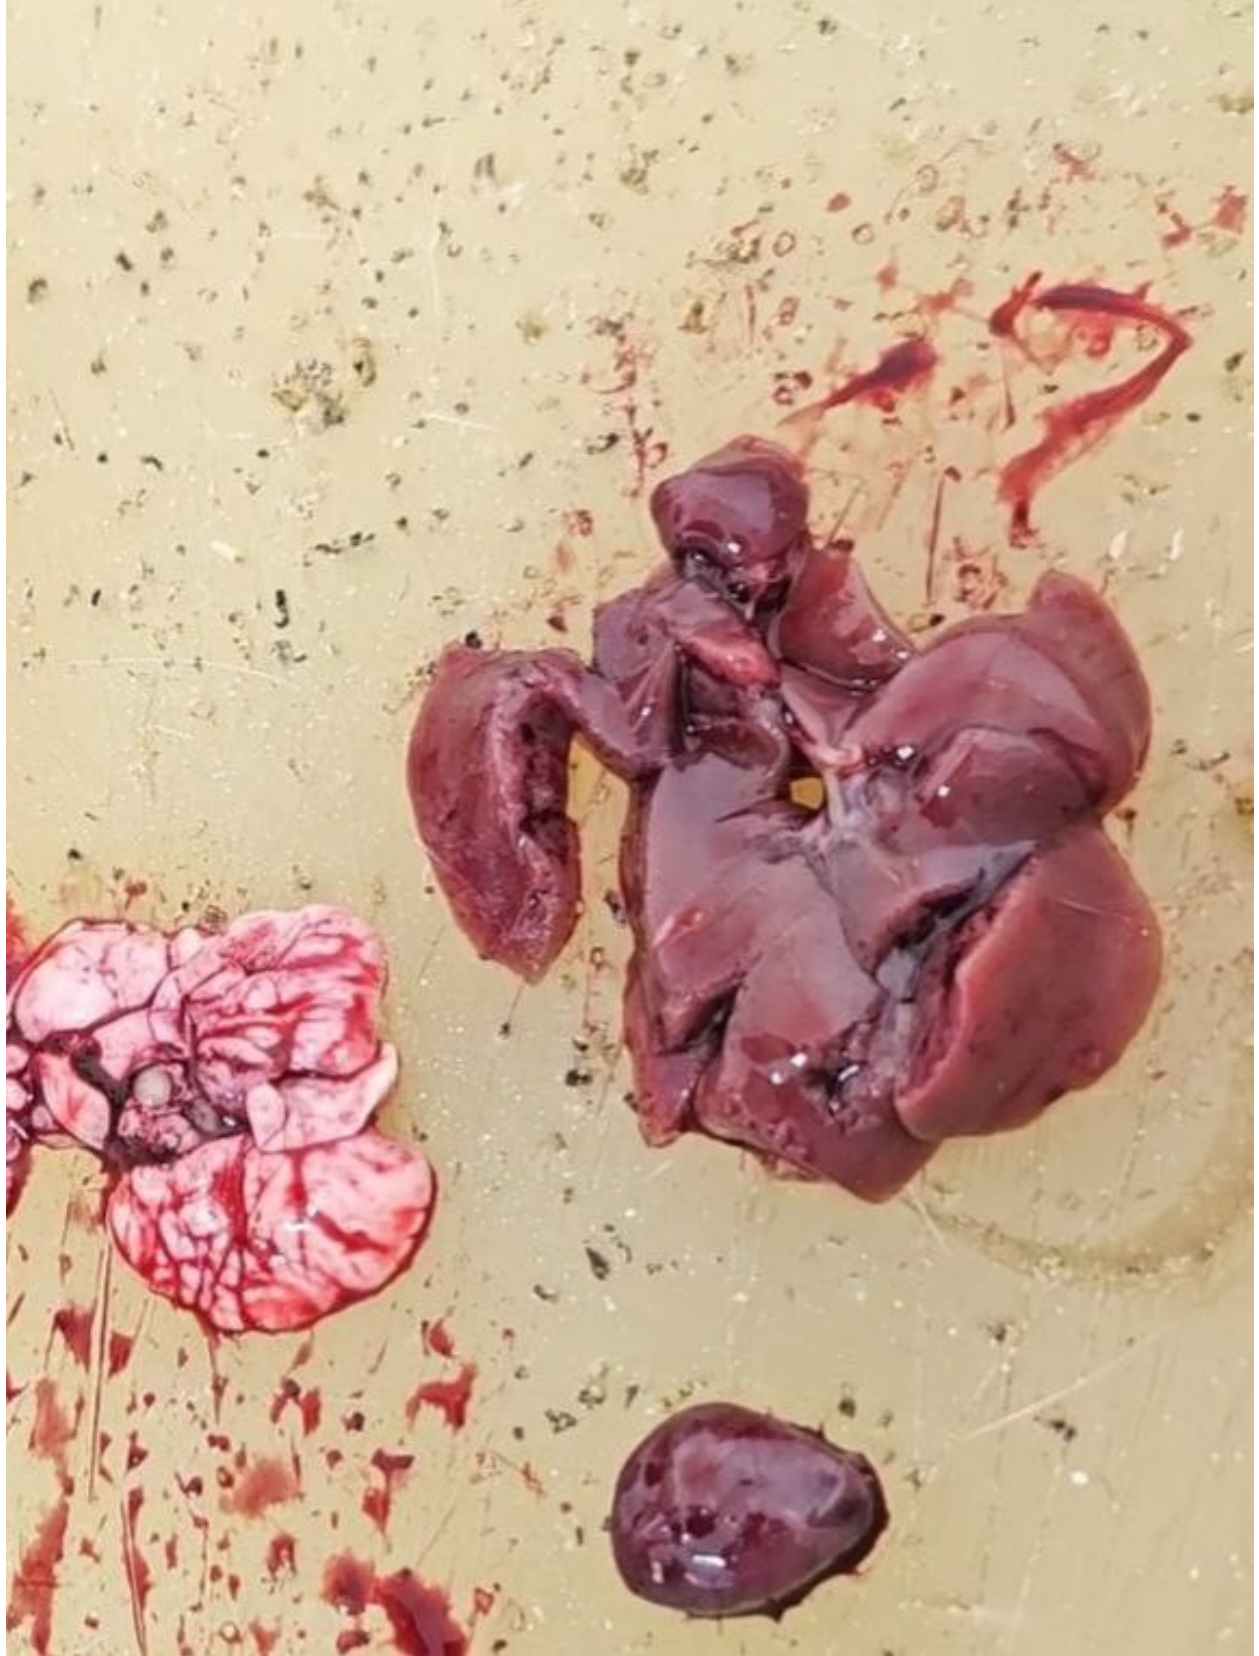

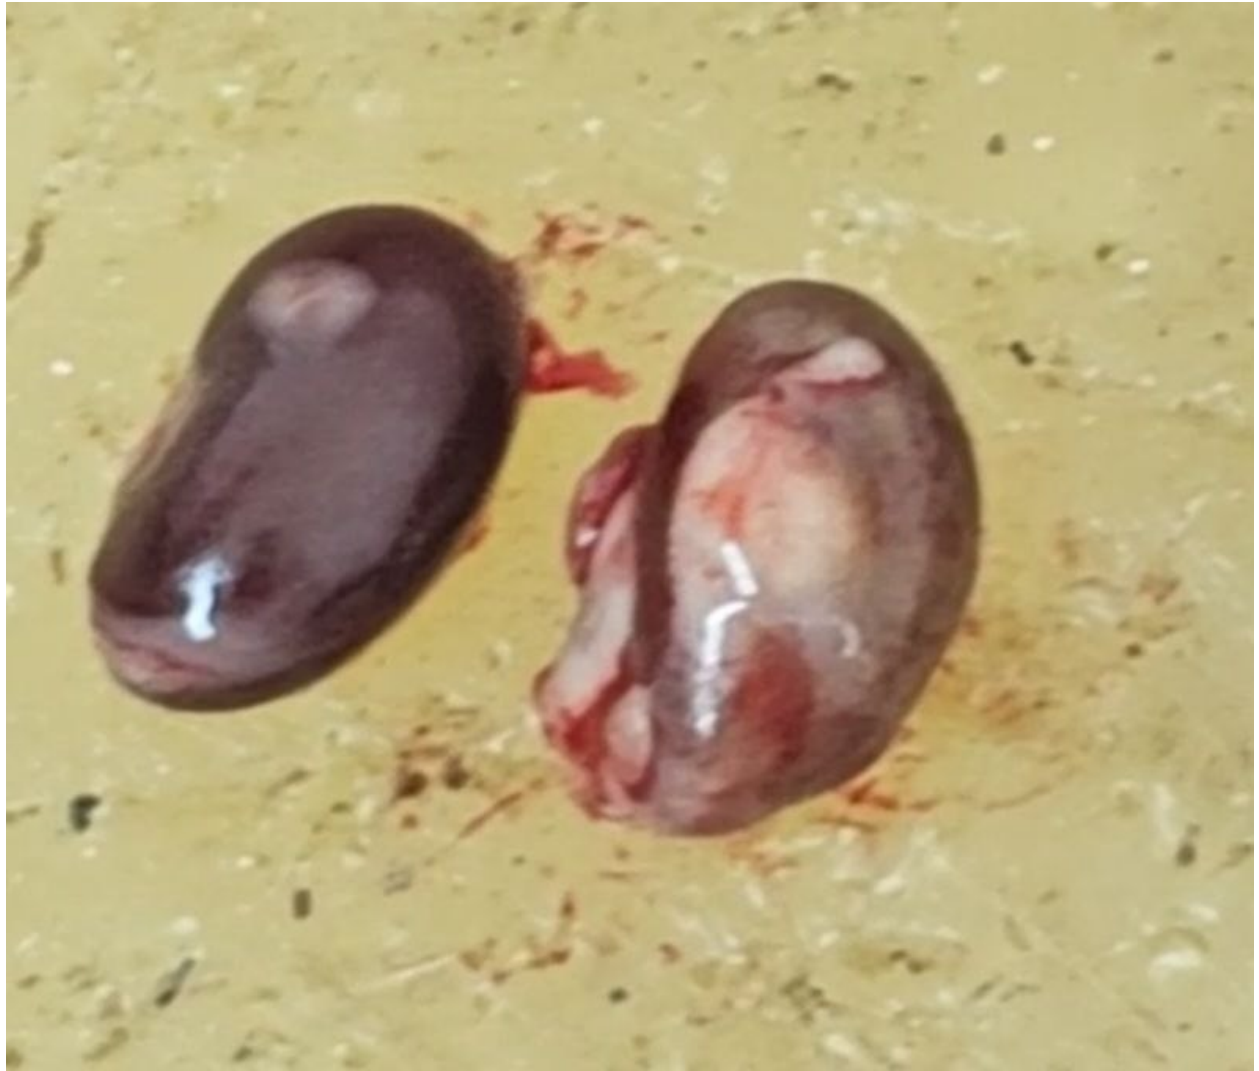



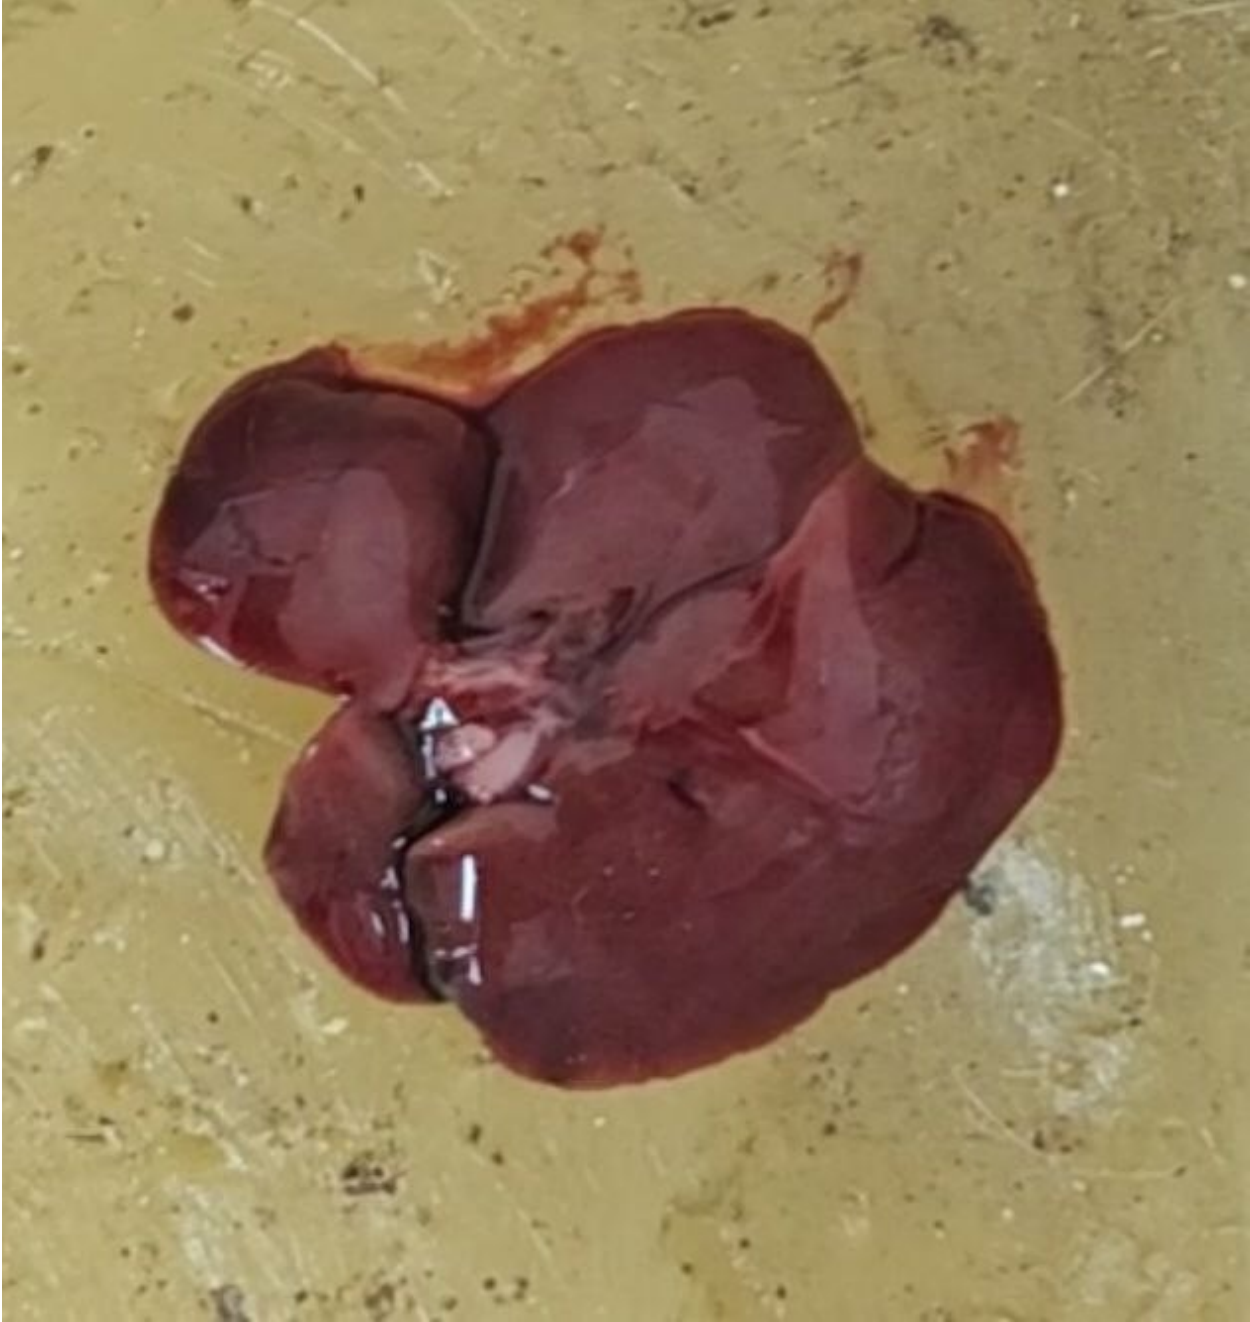

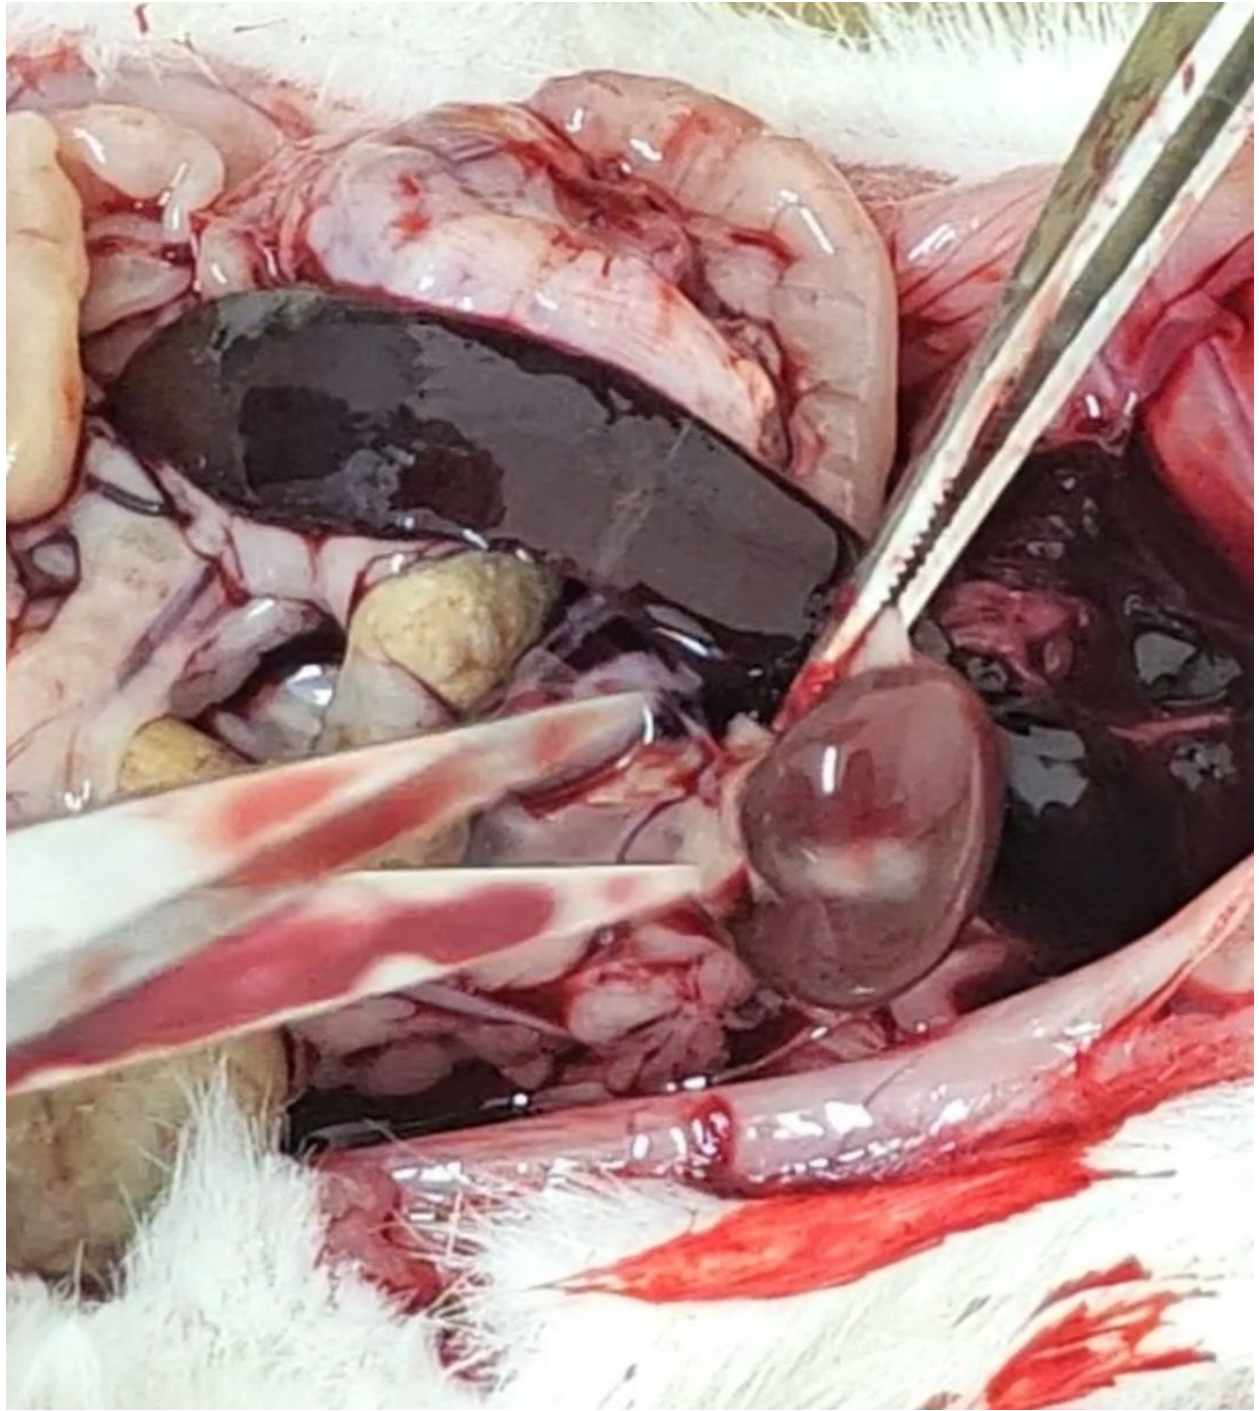

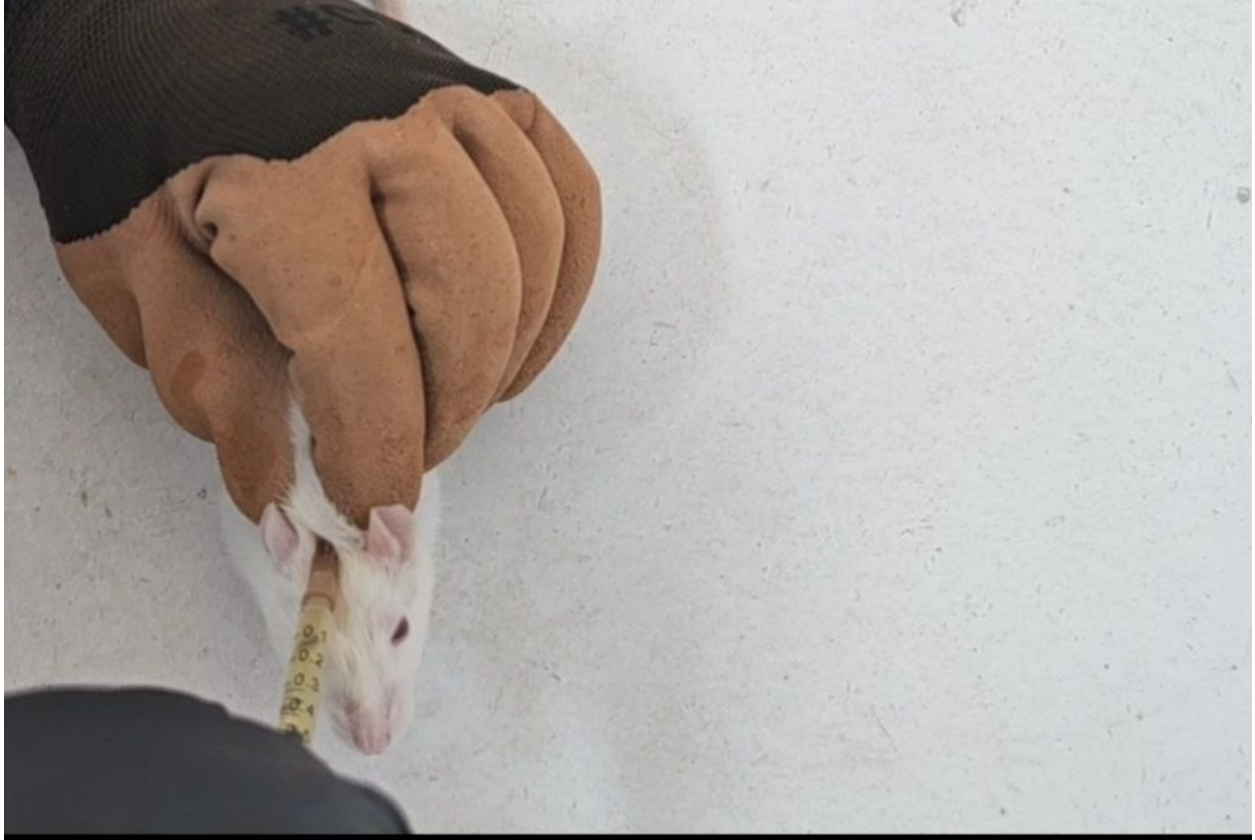

*Fig.S27-S35: Standard drug and -ve control acute toxicity measurement*

Table S1. Prediction in silico of **Metabolism** of 3a-c derivatives

| Entry     | Metabolism       |                  |                  |                   |                  |                  |                  |
|-----------|------------------|------------------|------------------|-------------------|------------------|------------------|------------------|
|           | CYP2D6 substrate | CYP3A4 substrate | CYP1A2 inhibitor | CYP2C19 inhibitor | CYP2C9 inhibitor | CYP2D6 inhibitor | CYP3A4 inhibitor |
| <b>3a</b> | NO               | NO               | YES              | YES               | YES              | NO               | NO               |
| <b>3b</b> | NO               | YES              | YES              | YES               | YES              | NO               | YES              |
| <b>3c</b> | NO               | YES              | YES              | YES               | YES              | NO               | YES              |

Table S2. Prediction in silico of **Toxicity** of 3a-c derivatives.

| Entry     | Toxicity      |                             |                  |                   |                                |                                   |                |                    |                              |                        |
|-----------|---------------|-----------------------------|------------------|-------------------|--------------------------------|-----------------------------------|----------------|--------------------|------------------------------|------------------------|
|           | AMES toxicity | Max. tolerated dose (human) | hERG I inhibitor | hERG II inhibitor | Oral Rat Acute Toxicity (LD50) | Oral Rat Chronic Toxicity (LOAEL) | Hepatotoxicity | Skin Sensitisation | <i>T.Pyriformis</i> toxicity | <i>Minnow</i> toxicity |
| <b>3a</b> | NO            | <b>0.042</b>                | NO               | YES               | <b>2.546</b>                   | <b>0.806</b>                      | YES            | NO                 | <b>0.532</b>                 | <b>1.933</b>           |
| <b>3b</b> | NO            | <b>0.243</b>                | NO               | YES               | <b>2.324</b>                   | <b>0.788</b>                      | YES            | NO                 | <b>0.371</b>                 | <b>0.05</b>            |
| <b>3c</b> | NO            | <b>0.562</b>                | NO               | YES               | <b>2.346</b>                   | 0.417                             | YES            | NO                 | <b>0.289</b>                 | <b>-0.154</b>          |
